# Supplementary material for: Tumor heterogeneity and immune-evasive T follicular cell lymphoma phenotypes at single-cell resolution
Source: PubMed Central journal article supplement (PMC10844096; doi:10.1038/s41375-023-02093-7), 2023-11-27
Supplement: 41375_2023_2093_MOESM1_ESM.pdf [file 41375_2023_2093_MOESM1_ESM.pdf]

## Supplemental Data

### Tumor heterogeneity and immune-evasive T follicular cell lymphoma phenotypes at single-cell resolution

Sakurako Suma<sup>1</sup>, Yasuhito Suehara<sup>1</sup>, Manabu Fujisawa<sup>2,3</sup>, Yoshiaki Abe<sup>2</sup>, Keiichiro Hattori<sup>1,2</sup>, Kenichi Makishima<sup>1</sup>, Tatsuhiko Sakamoto<sup>1,2</sup>, Aya Sawa<sup>4</sup>, Hiroko Bando<sup>4</sup>, Daisuke Kaji<sup>5</sup>, Takeshi Sugio<sup>6</sup>, Koji Kato<sup>7</sup>, Koichi Akashi<sup>7</sup>, Kosei Matsue<sup>8</sup>, Joaquim Carreras<sup>9</sup>, Naoya Nakamura<sup>9</sup>, Ayako Suzuki<sup>10</sup>, Yutaka Suzuki<sup>10</sup>, Ken Ito<sup>11</sup>, Hiroyuki Shiiba<sup>12</sup>, Shigeru Chiba<sup>1,2</sup>, and Mamiko Sakata-Yanagimoto<sup>1,2,13</sup>

<sup>1</sup> Department of Hematology, University of Tsukuba Hospital, Tsukuba, Japan.

<sup>2</sup> Department of Hematology, Institute of Medicine, University of Tsukuba, Tsukuba, Japan.

<sup>3</sup> Centre for Lymphoid Cancer, BC Cancer, Vancouver, BC, Canada.

<sup>4</sup> Department of Breast-Thyroid-Endocrine Surgery, University of Tsukuba Hospital, Tsukuba, Japan.

<sup>5</sup> Department of Hematology, Toranomon Hospital, Tokyo, Japan.

<sup>6</sup> Department of Medicine, Division of Oncology, Stanford University, Stanford, CA, USA.

<sup>7</sup> Department of Medicine and Biosystemic Science, Kyushu University Graduate School of Medical Science, Fukuoka, Japan.

<sup>8</sup> Division of Hematology/Oncology, Department of Internal Medicine, Kameda Medical Center, Kamogawa, Japan.

<sup>9</sup> Department of Pathology, Tokai University School of Medicine, Isehara, Japan.

<sup>10</sup> Department of Computational Biology and Medical Sciences, the University of Tokyo, Kashiwa, Japan.

<sup>11</sup> Oncology Business Unit, Eisai Co., Ltd., Tsukuba, Japan.

<sup>12</sup> Oncology Department, Medical Head Quarters, Eisai Co., Ltd., Tokyo, Japan.

<sup>13</sup> Division of Advanced Hemato-Oncology, Transborder Medical Research Center, University of Tsukuba, Tsukuba, Japan.

Supplementary Methods

Supplementary Notes

Supplementary Table Legends

Supplementary Figures (with legends)

## 1 **Supplementary Methods**

### 2 **Patients and clinical sample collection**

3 Lymph node (LN) and peripheral blood (PB) samples were collected from 14 patients with  
4 T follicular helper cell ( $T_{FH}$ ) lymphomas (TFHLs) at the University of Tsukuba Hospital, Kameda  
5 Medical Center (Kamogawa, Japan), and Toranomom Hospital (Tokyo, Japan) between October  
6 of 2019 and February of 2021. For two of the TFHL patients (AITL1 and AITL2), PB samples  
7 were collected at two-time points: once upon new diagnosis (ND) (AITL1<sub>ND</sub> and AITL2<sub>ND</sub>) and  
8 again upon refractory/relapsed (RR) disease (AITL1<sub>RR</sub> and AITL2<sub>RR</sub>). LN samples from AITL5  
9 and AITL7 were analyzed in a previously reported study [1]. For single-cell RNA sequencing  
10 (scRNA-seq) data from AITL4, only tumor cells were analyzed because systemic steroid  
11 administration for coexisting collagen disease may affect the composition of immune cells.  
12 Additionally, seven homeostatic LN (HLN) samples were also collected from patients with non-  
13 hematological malignancies at the University of Tsukuba Hospital and were confirmed as  
14 metastatic-free by flow cytometric (FCM) analysis of pan-cytokeratin. The patient characteristics  
15 are summarized in Table S1.

16

### 17 **Sample processing**

18 LN samples were minced immediately after excision and filtered with a 70- $\mu$ m strainer.  
19 The cells were washed with phosphate-buffered saline (PBS, Nissui, Tokyo, Japan), containing  
20 0.04% weight/volume bovine serum albumin (BSA, Sigma-Aldrich, Louis, MO, USA), and  
21 centrifuged twice for 5 min at  $300 \times g$  and 4°C. After removal of the supernatant, cells were  
22 resuspended in PBS/0.04% BSA and cell count and viability were estimated using a  
23 hemocytometer and trypan blue. After centrifugation for 5 min at  $300 \times g$  and 5°C once again,

24 cells were resuspended in PBS/0.04% BSA and diluted to  $1 \times 10^7$  cells/ml in preparation for  
25 analysis or cryopreservation.

26 PB samples were stored at 4°C immediately after collection and processed within 24 h.  
27 After red blood cell (RBC) lysis by the ammonium-chloride-potassium buffer, cells were washed  
28 once with PBS/0.04% BSA and centrifuged for 5 min at  $400 \times g$  and 4°C. After removal of the  
29 supernatant, cells were resuspended in 20 ml of PBS/0.04% BSA buffer and cell count and  
30 viability were estimated. Cells were centrifuged for 5 min at  $300 \times g$  and 4°C, diluted to  $1 \times 10^7$   
31 cells/ml and kept on ice until use.

32

### 33 **FCM analysis and sorting**

34 Surface protein expression analysis and sorting for scRNA-seq were performed using cell  
35 suspensions obtained from the LN and PB samples described above. To prevent non-specific  
36 reactions mediated by Fc receptors (FcRs), 20  $\mu$ l/ $10^7$  cells of FcR Blocking Reagent (Miltenyi  
37 Biotec, Bergisch Gladbach, Germany) was added, and cell suspensions were incubated in a  
38 refrigerator for 10 min, followed by staining based on the recommended concentration of each  
39 antibody. Dead cells and doublets were removed by 7-amino-actinomycin D (7-AAD, Thermo  
40 Fisher Scientific, Waltham, MA, USA) staining and forward versus side scatter plots (Fig. S1A–  
41 B). FCM sorting and analysis were performed on BD FACSAria III (BD Biosciences, San Jose,  
42 CA, USA). FlowJo software (v10.7.1, Tree Star Inc., Ashland, OR, USA) and the Ggplot2  
43 package (v3.3.3) [2] were used for FCM data analysis and visualization. All antibodies used are  
44 listed in Table S20.

45

## 46 **Library preparation, sequencing, and pre-processing of single-cell data**

47       The scRNA-seq libraries for mononuclear cells (MNCs) from LNs and PB were prepared  
48 using a Chromium Single Cell 5' Library & Gel Bead Kit (v1 chemistry, 10x Genomics,  
49 Pleasanton, CA, USA) or a Chromium Next GEM Single Cell 5' Library & Gel Bead Kit (v1.1  
50 chemistry) according to the manufacturer's instructions (CG000086 Rev L or CG000207 Rev  
51 E), aiming for 5 000 cells per library. Simultaneously, single-cell T- and B-cell receptor  
52 sequencing (scTCR/BCR-seq) was performed for samples with sufficient T or B cells (> 20% of  
53 all LN MNCs or > 10% of all PB MNCs; Table S1 and S4). scTCR/BCR-seq libraries were  
54 constructed using a Chromium Single Cell V(D)J Reagent Kit (v1 or v1.1 chemistry). T cell-  
55 enriched scRNA/TCR-seq libraries were generated similarly to the MNCs using sorted  
56 CD4/CD8<sup>+</sup> T cells. Quantification and quality control of libraries were performed using a 2100  
57 Bioanalyzer System with High Sensitivity DNA Kit (Agilent Technologies, Santa Clara, CA,  
58 USA) and a KAPA Library Quantification Kit for Illumina platforms (KAPA Biosystems,  
59 Wilmington, MA, USA). Each cDNA library was sequenced on the HiSeq X system (Illumina,  
60 San Diego, CA, USA) with a paired-end 150-base read option. The publicly available 5'  
61 scRNA-seq and scTCR/BCR-seq data from PB of 5 healthy donors (HDs) [3] generated by a  
62 Chromium system (Chromium Single Cell 5' Reagent Kit v2 chemistry and Chromium Single  
63 Cell V(D)J Reagent Kit) were used as controls (Table S1). The age and sex of individual donors  
64 were obtained from Supplementary Figure S1 of the original paper [3].

65       Using the "cellranger count" function of the Cell Ranger pipeline (v3.1.0, 10x  
66 Genomics), we aligned scRNA-seq data to the reference genome (GRCh38) and performed  
67 preliminary filtering and counting unique molecular identifiers (UMIs) for downstream analysis.  
68 For scTCR/BCR-seq data, sequence assembly and paired clonotype calling were performed  
69 with the "cellranger vdj" function. scRNA-seq and scTCR/BCR-seq data, after implementing

70 the Cell Ranger pipeline, were primarily analyzed using R (v3.6.0, v3.6.2 or v4.0.2) on RStudio  
71 (v1.2.1578 or v1.2.5019).

72

### 73 **Quality control (QC) of scRNA-seq data**

74 First, to remove low-quality cells and genes, only genes expressed by more than three  
75 cells and cells expressing over 200 genes were included in further analyses. Next, we applied  
76 the Scater package (v1.14.6) [4] to filter out outliers from count matrices for each sample.  
77 Briefly, we used several common QC metrics to detect outliers: library size, which was defined  
78 as the total sum of counts across all relevant features for each cell; the number of expressed  
79 features in each cell; and the percentage of reads mapped to mitochondrial transcripts. Outliers  
80 were identified based on the median absolute deviation from the median value of each QC  
81 metric across all cells. Cells identified as outliers were considered to be low quality and  
82 discarded. After excluding mitochondrial and ribosomal genes, the Seurat package (v3.2.3) [5,6]  
83 was applied to log-normalize the count data by the default scale factor of 10 000.

84

### 85 **Batch effects correction and data integration**

86 The mutual nearest neighbors (MNN) batch correction technique in the Batchelor  
87 package (v1.2.4) [7] was utilized to remove batch effects between datasets resulting from  
88 technical biases and biological differences. Unlike the original method, the  
89 “batchelor::fastMNN” function performs principal components analysis (PCA) on the  
90 previously selected highly variable features (HVF) to preemptively reduce the dimensions and  
91 speed up MNN identification and correction. For integrating data from LNs of patients with  
92 TFHL and HLNs, we used 2 000 HVFs and the first 50 principal components (PCs) for

93 downstream steps. For data from PB, 3 000 HVFs and the first 100 PCs were used instead. In  
94 LN data, variable genes of TCR $\alpha\beta$  and immunoglobulins (*TRAV*, *TRBV*, *IGHV*, *IGKV*, and  
95 *IGLV*) were removed from the HVF selection to avoid their effect on clustering. We applied the  
96 “RunFastMNN” function in the SeuratWrappers package (v0.3.0;  
97 <https://github.com/satijalab/seurat-wrappers>) for running the “fastMNN” function with a Seurat  
98 object.

99

## 100 **Unsupervised clustering and non-linear dimensional reduction**

101 Subsequently, we applied Seurat to perform unsupervised graph-based clustering and  
102 Uniform Manifold Approximation and Projection (UMAP) visualization using the MNN-  
103 corrected components as input. Using the “FindNeighbors” function, a k-nearest neighbor graph  
104 was constructed based on the Euclidean distance and a shared nearest neighbor graph was  
105 generated by computing the neighborhood overlap between any two cells. Next, the  
106 “FindClusters” function was used to identify clusters by the Louvain algorithm (default setting),  
107 which was a shared nearest neighbor modularity optimization-based clustering algorithm. For  
108 visualization, UMAP transformation was performed using the “RunUMAP” function.

109

## 110 **Finding cluster biomarkers and cell type annotation**

111 To characterize each cluster, we used the “FindMarkers” or “FindAllMarkers” functions  
112 in the Seurat package to select upregulated genes in each cluster relative to other clusters. These  
113 functions performed the Wilcoxon Rank Sum test between pairs of clusters and a *P*-value  
114 adjustment using the Bonferroni correction. Clusters were manually assigned to a cell type by  
115 comparing the marker genes of each cluster and known canonical markers. Specifically, we

116 annotated CD3 gene (*CD3D*, *CD3E*, and *CD247*)- and *CD4* or *CD8* gene (*CD8A* and *CD8B*)-  
117 positive clusters as "CD4/CD8<sup>+</sup> T cells", *CD79A*-positive clusters as "B cells," and myeloid cell  
118 marker (*LYZ*, *CD68*, and *CST3*) [8,9]-positive clusters as "myeloid cells." CD3 gene-positive or  
119 weakly positive but *CD4* and *CD8* gene-negative and natural killer (NK) cell marker (*XCL1*,  
120 *FCGR3A*, *KLRD1*, and *KLRF1*) [10]- or  $\gamma\delta$ T cell marker (*TRDV2*, *TRGV9*, *TRDC*, *TRGC2*, and  
121 *TRGCI*) [11]-positive clusters were named as "NK cells" (for LNs) or "NK/ $\gamma\delta$ T cells" (for PB  
122 samples). We also identified a *CD34*-positive "progenitor cell" cluster as a rare cell type (81  
123 cells in all PB MNCs) in PB. Platelet clusters characterized by *PPBP*, *GP9*, and *PF4* and RBC  
124 clusters characterized by *HBB* and *HBAI* were excluded from downstream analyses. For  
125 clusters featured by the expression of multiple cell-type marker genes, we used the scDblFinder  
126 package (v1.4.0) [12] and confirmed that most cells in these clusters were doublets. These cells  
127 were also removed from further analysis.

128         Subsequently, after identifying tumor cells by the method described below, we  
129 subclustered immune cells by major cell types and annotated each cluster based on canonical  
130 markers. Results of manual annotations were confirmed by automated annotation by the  
131 SingleR package (v1.4.1) [13] with reference to previously published single-cell data.

132

### 133 **Single-cell TCR/BCR repertoire analysis**

134         We identified clonotypes from scTCR/BCR-seq data after running the Cell Ranger pipeline.  
135 Clonotypes were identified by sets of cells with unique and "productive" TCR $\alpha$ - and/or  $\beta$ -chains  
136 (for B cells, immunoglobulin [Ig] heavy [IgH] chains and two types of light [IgL] chains:  $\kappa$  or  $\lambda$   
137 [IgK or IgL] chains), defined by identical complementarity-determining region 3 (CDR3)  
138 sequences. Here, a "productive" sequence refers to an mRNA sequence that could be translated  
139 into a functional protein. Those TCR- or Ig-chain sequences judged as productive met the

140 following conditions: were full length (include from the beginning of the V gene to the end of the  
141 J gene), started with a start codon, contained no stop codon, were in-frame, contained a CDR3  
142 sequence, and matched the structural requirements calculated from the length of the V and J gene  
143 regions of the sequence ([https://support.10xgenomics.com/single-cell-  
144 vdj/software/pipelines/3.1/algorithms/annotation](https://support.10xgenomics.com/single-cell-vdj/software/pipelines/3.1/algorithms/annotation)). These clonotypes were named clonotype 1,  
145 clonotype 2, and so on from the most clonally extended ones for each sample. Generally,  $\alpha\beta$ T and  
146 B cells express a pair of functional  $\alpha$ - and  $\beta$ -chains or H- and L-chains but, occasionally, a single  
147 cell expresses multiple functional TCR or Ig chains [14–17]. Therefore, we detected up to two  
148 productive TCR $\alpha$ - and  $\beta$ -chains (IgH- and L-chains) in each cell. Downstream analysis of  
149 scTCR/BCR-seq was performed using the Immunarch package (v0.6.6) [18].

150

### 151 **Tumor cell detection in TFHL LNs and PB**

152 For LNs, we defined clonotypes that were expressed by over 20 CD4<sup>+</sup> T cells and  
153 accounted for over 1.5% of all T cells with TCRs as “major tumor-cell clonotypes” and cells  
154 with tumor-cell clonotypes as “tumor cells” (Fig. 1C; Table S3). Clonotypes composed only of  
155 the TCR  $\alpha$ - and/or  $\beta$ -chains identical to the major tumor-cell clonotypes and expressed by five  
156 or more CD4<sup>+</sup> T cells were defined as “minor tumor-cell clonotypes.” Cells expressing a minor  
157 tumor-cell clonotype were also defined as tumor cells. Major and minor tumor-cell clonotypes  
158 with the same TCR chains were grouped together as “tumor-clone subgroups” (Table S3).

159 In nine PB samples, with their paired LNs also subjected to single-cell sequencing, cells  
160 harboring identical clonotypes to those of their respective LN tumor cells were defined as tumor  
161 cells (Fig. S16A). In the remaining seven PB samples without paired LN single-cell data,  
162 clonotypes that were expressed by over 100 cells and accounted for more than 10% of all TCRs  
163 were defined as tumor-cell clonotypes. In patients with TFHL with sequential samples (AITL1



164 and AITL2), cells expressing the clonotypes identical to those of tumor cells of the sequential  
165 sample were defined as tumor cells, even if no clonotype met the definition above (Fig. S16B).

166

### 167 **Differentially expressed gene (DEG) analysis**

168 We performed DEG analysis using the “FindMarkers” or “FindAllMarkers” functions of  
169 Seurat. The model-based analysis of single-cell transcriptomics (MAST, v1.12.0) [19] method  
170 was mainly used for DEG detection, and *P*-values were corrected by the Bonferroni method. In  
171 addition, the Wilcoxon rank sum test confirmed the DEGs detected by MAST. Genes with an  
172 adjusted *P*-value < 0.05 in both tests, with a log fold-change (logFC) of the average expression  
173 between the two groups  $\geq 0.15$  (logfc.threshold = 0.15), and expressed by  $\geq 10\%$  of cells in the  
174 cluster (min.pct = 0.1) were considered significant. An adjusted *P*-value calculated by MAST  
175 was used to create a volcano plot. Metascape [20] and gene set enrichment analysis (GSEA;  
176 v4.1.0) [21] were used for gene ontology (GO) and pathway analyses of DEGs in specific  
177 clusters, respectively.

178

### 179 **Gene set variation analysis (GSVA)**

180 The GSVA package (v1.34.0) [22] was applied to estimate signatures or pathways  
181 enriched by each cell and cluster. The normalized data after log transformation was used as  
182 input, and the Gaussian kernel was selected as the kernel function used for the nonparametric  
183 estimation of enrichment scores for each cell. Gene sets for GSVA were downloaded from the  
184 Molecular Signatures Database (MSigDB; <http://www.gsea-msigdb.org/gsea/msigdb/index.jsp>)  
185 or extracted from a previously published RNA-seq dataset by DEG analysis using the edgeR  
186 package (v3.28.1) [23,24]. We used raw count data as input for DEG analysis by edgeR, filtered

187 out low-expression genes using the “filterByExpr” function, performed trimmed mean of M-  
188 values (TMM) normalization using the “calcNormFactors” function, and applied a generalized  
189 linear model (GLM) using the likelihood ratio test (LRT) with the “glmLRT” function. DEGs  
190 with an adjusted  $P$ -value  $< 0.05$  and  $\log_{2}FC \geq 1$  were extracted by the “decideTests” function.  
191 Finally, we performed the pairwise Wilcoxon test and Bonferroni  $P$ -value correction using the  
192 rstatix package (v0.7.0) [25] to compare median GSVA enrichment scores for each cluster.

193

## 194 **Trajectory analysis**

195 Trajectory analysis was performed using the Monocle2 (v2.18.0) [26], Monocle3  
196 (v0.2.3.0) [27], and Slingshot (v1.8.0) [28] packages. The count data before normalization after  
197 QC was used as the input data for Monocle2. After estimating size factors and dispersions with  
198 the “estimateSizeFactors” and “estimateDispersions” functions, DEGs for each cluster were  
199 extracted with the “differentialGeneTest” function. Using only DEGs with a  $P$ -value  $< 0.01$ , the  
200 “reduceDimension” function performed a DDRTree reduction, and the “orderCells” function  
201 sorted the cells in trajectory order. In the Monocle3 analysis, we first converted the Seurat  
202 object to a “cell\_data\_set” object that could be used in Monocle3 by the “as.cell\_data\_set”  
203 function. After clustering with the “cluster\_cells” function, trajectory estimation and cell sorting  
204 were performed using the “learn\_graph” and “orderCells” functions, using the results of  
205 dimensional reduction by UMAP executed by Seurat. In trajectory analysis by Slingshot, after  
206 converting the Seurat object to a “SingleCellExperiment” object using the  
207 “as.SingleCellExperiment” function, dimensionality reduction data after batch effect correction  
208 by fastMNN and clustering results by Seurat were used. Trajectory estimation was performed  
209 by the “slingshot” function. We used the rgl package (v0.107.14,  
210 <https://github.com/dmurdoch/rgl>) for 3D plots.

211

## 212 **Cell-cell interaction analysis**

213       Ligand-receptor interactions between each cluster were estimated using the Python  
214 package CellPhoneDB (v3.0.0) [29] and the R package NicheNetR (v1.0.0) [30]. We used  
215 Python v3.8.5 for this analysis. In the CellPhoneDB analysis, we first performed the “statistical  
216 method” and obtained *P*-values. Specifically, only ligand-receptor pairs expressed by over 10%  
217 of the cells in each cluster were selected for analysis. Then, we randomly permuted the cluster  
218 labels of all cells 1 000 times to create a null distribution of the mean of the average ligand and  
219 receptor expression levels in the interacting clusters. *P*-values for the probability of enrichment  
220 within clusters for each ligand-receptor complex were obtained by calculating the percentage of  
221 the means equal to or higher than the actual mean. Subsequently, we performed the “DEGs  
222 analysis method,” using DEGs upregulated in each cluster of LNs from patients with ND or RR  
223 TFHL versus HLNs as the input genes of the DEG list. As for CD8 T<sub>DYS</sub> (T9), since the number  
224 of cells belonging to CD8 T<sub>DYS</sub> of HLNs was too small to perform proper DEG analysis, we  
225 compared them with CD8 T<sub>EFF</sub> (T8) of HLNs. Genes whose expression profiles were  
226 significantly elevated in the tumor cells versus non-malignant cells were used as the DEGs for  
227 the tumor cells. In the “DEGs analysis method,” only ligand-receptor pairs expressed by over  
228 10% of the cells in each cluster and for which at least one gene was included in the DEG list  
229 were extracted as significant interactions. Finally, interactions detected as significant by both  
230 methods were extracted and the numbers of interactions for each cluster were plotted in  
231 heatmaps.

232       NicheNetR is a tool for predicting ligands that can promote gene expression changes in  
233 specific target cells (“receiver/target”). In this analysis, the group of genes representing gene  
234 expression changes in target cells was defined as a “gene set of interest (geneset\_oi).” The CD8

235 T<sub>DYS</sub> (T9) cluster and tumor cells from RR TFHL were set as receivers and senders,  
236 respectively. Initially, genes expressed by over 10% cells in each cluster designated as a  
237 receiver or sender were used as “expressed\_genes\_receiver” and “expressed\_genes\_sender,”  
238 respectively. Since the number of cells belonging to CD8 T<sub>DYS</sub> of HLN was too small to  
239 perform proper DEG analysis, DEGs between CD8 T<sub>DYS</sub> of RR TFHL LN and CD8 T<sub>EFF</sub> (T8)  
240 of HLN with an adjusted *P*-value < 0.05, min.pct = 0.1, and logFC ≥ 0.35 were used as  
241 “geneset\_oi.” Next, we used the “predict\_ligand\_activities” function to estimate and rank the  
242 potential ligands of target genes in “geneset\_oi.” Among the potential ligands, the top 20 were  
243 used as the “best\_upstream\_ligands” for the following analysis. Furthermore, the  
244 “get\_weighted\_ligand\_target\_links” and “lr\_network” functions predicted target genes and  
245 receptors of the “best\_upstream\_ligands.” Finally, only bonafide interactions based on validated  
246 curated ligand-receptor databases were visualized in heatmaps.

247

#### 248 **Whole-exome sequencing (WES) and data processing**

249 Genomic DNA were extracted from fresh frozen tumor tissue and PB samples, formalin-  
250 fixed paraffin-embedded (FFPE) tumor samples, and paired buccal swab samples to be used as  
251 reference using a QIAamp DNA Blood Mini Kit or GeneRead DNA FFPE Kit (Qiagen, Hilden,  
252 Germany) (Table S1). After DNA integrity number (DIN) values were measured using Agilent  
253 TapeStation 2200 (Agilent Technologies) for quality control, DNA was fragmented with DNA  
254 Shearing S220 (Covaris, Woburn, MA, USA). Exome capturing was performed using a  
255 SureSelect XT Human All Exon V7 kit (Agilent Technologies). Next, 150-bp paired-end  
256 sequencing was carried out according to the manufacturer’s recommendations on a HiSeq X  
257 Ten system (Illumina).

258 Sequencing reads were aligned to the reference genome (GRCh37) using the Burrows-  
259 Wheeler Aligner (v.0.7.8). Mutation calling was performed using the Genomon2 pipeline  
260 (v.2.6.2, <https://github.com/Genomon-Project>) as previously described [1,31,32] with minor  
261 modifications. Putative somatic mutations with a Fisher's exact  $P$ -value  $< 0.01$  or an EB call  $P$ -  
262 value  $> 2.0$ , sequencing depth  $\geq 30$ , and variant reads  $> 4$  were adopted. Furthermore, variants  
263 only in unidirectional reads; variants in repetitive genomic regions; variants in intergenic,  
264 intronic, untranslated, and noncoding RNA regions; and synonymous single-nucleotide variants  
265 were excluded. Additionally, known recurrently mutated genes in TFHL, including *RHOA*  
266 *G17V*, *TET2*, *DNMT3A*, and *IDH2*, were manually screened for as additional mutations.  
267 Mapping errors were excluded by visual inspection with Integrative Genomics Viewer (IGV)  
268 [33]. Detected somatic mutations are listed in Table S5.

269 Somatic copy number variations (CNVs) were analyzed by the Genome Analysis Tool Kit  
270 (GATK; v4.2, Broad Institute, Cambridge, MA, USA) [34]. Buccal samples were used as a  
271 panel of normals. The interval list was generated from the target browser extensible data (BED)  
272 file of the SureSelect XT Human All Exon V7 kit downloaded from the Agilent website  
273 (<https://earray.chem.agilent.com/suredesign/index.htm>). Gains and losses less than 1 Mb in  
274 length were removed from downstream analyses.

275

### 276 **Inferring genetic mutations using scRNA-seq data**

277 We applied VarTriX (v1.1.16, 10x Genomics, <https://github.com/10XGenomics/vartrix>) to  
278 extract single-cell variant information from scRNA-seq data. First, BED files of the somatic  
279 mutations extracted by the Genomon2 pipeline for WES data were lifted from GRCh37 to  
280 GRCh38 with the UCSC web browser (<https://genome.ucsc.edu/cgi-bin/hgLiftOver>). Then, the  
281 BED files converted to variant call format (VCF) were used as input for VarTriX. We ran the

282 “vartrix” command with --mapq 255, --padding 100, and --umi mode options using a cell barcode  
283 file extracted from the integrated Seurat object and a binary alignment map (BAM) file generated  
284 by the Cell Ranger pipeline for each sample. Briefly, local sequence alignment at the input variant  
285 locus was performed by the Smith-Waterman algorithm, and then wild-type and mutant reads  
286 were counted for each cell, respectively. In --umi mode, a consensus is taken across each UMI,  
287 and only cases where each UMI exceeded a hardcoded 90% threshold for supporting the same  
288 allele were reflected in the results. Owing to the phenomenon commonly occurring in scRNA-  
289 seq called “allelic dropout” (insufficient amplification of one allele), it is impossible to judge  
290 whether a cell is a “truly wild type (WT)” in the absence of mutant reads [35]. Therefore, we  
291 defined a cell as “unknown” if only WT reads or no reads were detected. Cells from THFL patients  
292 without WES-identified mutations were classified as “WT” cells.

293

#### 294 **Estimation of CNVs at the single-cell level**

295 To infer large-scale CNVs from scRNA-seq data, we applied the R package inferCNV  
296 (v1.10.1). [36] Non-malignant T cells from each sample were used as controls for analysis of  
297 PB and LN tumor cells. We used the following parameters: default de-noise and hidden Markov  
298 model (HMM) setting, cutoff = 0.1, cluster\_by\_groups = FALSE, analysis\_mode =  
299 ‘subclusters’, and tumor\_subcluster\_partition\_method = ‘random\_trees’. Specifically, after  
300 removing noise with the default settings, the random trees method was used to divide cells into  
301 groups with consistent CNV patterns, and CNV prediction by HMM was performed at the  
302 subcluster level. Uphyloplot2 (v2.3) [37] was applied to visualize phylogenetic trees using the  
303 inferCNV output of each sample. CNV scores for each cell were calculated as previously  
304 described [38].

305

306 **Immunohistochemical (IHC) staining**

307       Regarding *PLS3*, which was identified as a candidate tumor cell-specific gene, IHC  
308 staining using FFPE samples of tumor tissues was performed by either the Tsukuba Human  
309 Tissue Biobank Center Tsukuba Pathological Analysis Support Service (T-PASS, Tsukuba,  
310 Japan) or expert hematopathologists at Tokai University School of Medicine. After antigen  
311 retrieval with Target Retrieval Solution pH 9.0 (Dako, Santa Clara, CA, USA) using the  
312 automated pretreatment system PT Link (Dako; 97°C, 20 min), anti-PLS3 antibody (Sigma-  
313 Aldrich) diluted 1:100 was added, and samples were stained with Autostainer Link 48 (Dako).  
314 PLS3 staining was determined to be positive when 10% or more of the cells were positive.

315

316 **High-dimensional spatial analysis by imaging mass cytometry (IMC)**

317       Carrier-free antibodies were manually conjugated to metal isotopes using the MaxPar 8X  
318 antibody labeling kit (Standard BioTools Inc., South San Francisco, CA, USA) following the  
319 manufacturer's protocol (Maxpar Antibody Labeling Kit PRD002 Version 11). Manually  
320 conjugated or pre-metal-tagged antibodies obtained from Standard BioTools Inc. were used for  
321 IMC staining (Table S17). FFPE samples from TFHL tissues were incubated in a dry oven for  
322 15 min at 55°C, deparaffinized, and rehydrated using a graded ethanol series. Antigen retrieval  
323 was performed using Target Retrieval Solution pH 9.0 (Dako) in a Decloaking Chamber  
324 (Biocare Medical, Pacheco, CA, USA) for 10 min at 95°C. Slides were incubated overnight at  
325 4°C with a cocktail of metal-conjugated primary antibodies after blocking with buffer  
326 containing 3% BSA. The following day, slides were washed twice with Dulbecco's PBS and  
327 counterstained using Cell-ID Intercalator-Ir (Standard BioTools Inc.) for 30 min at RT to  
328 visualize the DNA. After a final wash in doubly distilled H<sub>2</sub>O, the slides were air-dried for 20

329 min. IMC data was acquired using a Hyperion imaging system (Standard BioTools Inc.).  
330 Subsequently, five regions of interest (ROIs) of  $1\,500 \times 1\,500\ \mu\text{m}$  per 1 FFPE sample were  
331 identified on consecutive Hematoxylin and Eosin (H&E)-stained slides and ablated by the laser  
332 beam.

333 We converted raw data, exported as MCD files, to the OME-TIFF format and segmented  
334 into single cells using the `ImcSegmentationPipeline` [39]. Specifically, we applied `Ilastik`  
335 (v1.3.3) [40] for pixel classification and generated pixel probability maps for three labels  
336 (“nucleus,” “cytoplasm,” and “background”). Then, cells were segmented based on pixel  
337 probabilities and single-cell or image features, such as channel intensities and the number of  
338 neighbors, were measured using the `CellProfiler` (v4.2.1) [41].

339 The output data from `CellProfiler` was imported into R (v4.1.0) as a `SpatialExperiment`  
340 object by the `imcRtools` package (v1.0.2) [42]. After the inverse hyperbolic sine transformation  
341 and normalization at the 99th percentile, batch effect correction and unsupervised clustering  
342 were performed using the `Batchelor` and `Seurat` packages, like with the scRNA-seq data. When  
343 performing clustering, four proteins with poor cell-to-cell variability (CD10, E-cadherin,  
344 ICOSL, and CD40LG) and two proteins related to the stromal structures ( $\alpha$ -smooth muscle  
345 actin [SMA] and collagen type I) were excluded. By annotation with canonical markers, we  
346 identified a  $T_{\text{FH}}$  marker-positive cluster thought to be tumor cells and performed re-clustering  
347 with immune and stromal cells other than tumor cells. Next, we computed the averaged cell-cell  
348 interaction counts and compared them to a null distribution of counts generated by random  
349 permutations to estimate the interaction or avoidance between cell types using the  
350 “`testInteractions`” function of `imcRtools` (Table S19). Finally, the pixel- and cell-level  
351 visualization of each image was performed by the `cytomapper` package (v1.6.0) [43].

352



353 **Code Availability**

354 The code used for data analysis are available from the corresponding author upon request  
355 (sakatama@md.tsukuba.ac.jp [M.S.-Y.]).

356

357 **Supplementary Notes**

358 **Supplementary Note 1: Related to “Expansion of dysfunctional CD8<sup>+</sup> and regulatory T cells  
359 in LNs” and “Clonal tracking between T cells in LNs and PB”**

360 The following is a comment regarding subclustering and the TCR analysis of non-malignant PB  
361 T cells.

362 Subclustering of non-malignant PB T cells revealed a similar immunophenotype to those  
363 of LNs. Specifically, the proportions of CD8 T<sub>DYS</sub> and T<sub>PRO/DYS</sub> were increased, whereas those of  
364 CD4/CD8 T<sub>N</sub> and T<sub>CM</sub> were decreased in patients with TFHL compared with those in HDs (Fig.  
365 S10A–B). Although the increase in the proportion of T<sub>REG</sub> was not significant, the proportion of  
366 proliferating T<sub>REG</sub> and the expression levels of T<sub>REG</sub> activation markers such as *FOXP3*, *BATF*,  
367 *TNFRSF4*, and *TNFRSF18* [44] and co-inhibitory molecules such as *PDCDI* and *TIGIT* were  
368 higher in the T<sub>REG</sub> of patients with TFHL than those of HDs (Fig. S10C–F).

369 By TCR repertoire analysis of non-malignant T cells in PB, we found that effector CD8<sup>+</sup>  
370 T cells (effector memory [T<sub>EM</sub>] and effector memory cells re-expressing CD45RA [T<sub>ERMA</sub>]) were  
371 clonally expanded in both patients with TFHL and HDs, whereas CD8 T<sub>DYS</sub>/T<sub>PRO/DYS</sub> were  
372 clonally expanded only in the patients with TFHL (Fig. S17A). TCR overlap analysis showed  
373 that CD8 T<sub>DYS</sub> and CD8 T<sub>PRO/DYS</sub> shared their TCRs in TFHL PB while no shared TCRs were  
374 detected between effector and dysfunctional CD8<sup>+</sup> T cells of TFL PB, unlike the LN data (Fig.  
375 S17B). In addition, over 50% of known, pathogen-specific CDR3s, such as cytomegalovirus

376 (CMV), Epstein-Barr virus (EBV), and influenza virus detected by collation with VDJdb  
377 database [45], were concentrated in effector CD8<sup>+</sup> T cells in both TFHL patients and HDs,  
378 suggesting that they were “bystander” CD8<sup>+</sup> T cells that recognized antigens unrelated to tumor  
379 cells (data not shown).

380

381 **Supplementary Note 2: Related to “*In-silico* and spatial intercellular interactions and**  
382 **formation of the TFHL immune-evasive microenvironment”**

383 The following is a comment regarding the subclustering and annotation of non-malignant cells  
384 in the spatial analysis.

385 By unsupervised clustering and annotation using canonical markers, we identified 14  
386 subclusters: granzyme B (GZMB)<sup>low</sup> PD1<sup>high</sup> CD8 T<sub>DYS</sub>, GZMB<sup>high</sup> PD1<sup>low</sup> CD8 T<sub>EFF</sub>,  
387 FOXP3/CD25<sup>+</sup> T<sub>REG</sub>, CD3/CD4<sup>+</sup> or CD3/CD8<sup>+</sup> T cells, CD19<sup>+</sup> B cells, CD3<sup>-</sup> CD4<sup>dim</sup> CD14<sup>+</sup>  
388 myeloid cells, CD3/CD4/CD19<sup>-</sup> CD132/CD11B<sup>+</sup> NK cells, and CD21/CD35<sup>+</sup> follicular  
389 dendritic cells (FDCs) (Table S18). Cluster 10 showed CD20<sup>-</sup> CD19/CD79A<sup>dim</sup>, annotated as  
390 PBL/PC (Fig. S18A). Cluster 13 exhibited high expressions of  $\alpha$ -SMA and collagen type I,  
391 whereas lineage markers were negative (Fig. S18B), suggestive of stromal cells such as  
392 endothelial cells of blood and lymphatic vessels.

393 Consistent with previous reports on AITL [46], FDCs formed meshwork structures and  
394 were identified as indistinguishable clusters from surrounding cells (clusters 3, 6, and 11; Fig.  
395 S18C). Moreover, B cells adjacent to tumor cells were recognized as a single cluster with tumor  
396 cells (cluster 12; Fig. S18D).

397 **Supplementary Table Legends**

398 **Supplementary Table 1.** Characteristics of patients with TFHL and controls and comparison of  
399 patient cohorts.

400 **Supplementary Table 2.** IMC analysis of TFHL tumor tissues.

401 **Supplementary Table 3.** Summary of tumor-cell clonotypes detected by scTCR-seq.

402 **Supplementary Table 4.** Proportion of cells detected by scRNA-seq and FCM analysis.

403 **Supplementary Table 5.** Somatic mutations detected by WES of 14 patients with TFHL.

404 **Supplementary Table 6.** Marker genes for each subcluster of LN and PB tumor cells.

405 **Supplementary Table 7.** Somatic mutations detected by reanalysis of scRNA-seq.

406 **Supplementary Table 8.** DEGs upregulated in LN and PB tumor cells compared with all  
407 MNCs and normal T<sub>FH</sub> cells.

408 **Supplementary Table 9.** DEG analysis of three candidate genes for novel tumor cell-specific  
409 markers compared with all non-malignant MNCs.

410 **Supplementary Table 10.** IHC staining of PLS3 on PTCLs and B-cell lymphomas.

411 **Supplementary Table 11.** DEGs between T<sub>REG</sub> of RR TFHL LNs and HLNs.

412 **Supplementary Table 12.** DEGs between *FCRL4*<sup>+</sup> MBCs (B2) and *FCRL4*<sup>-</sup> MBCs (B1) of  
413 LNs.

414 **Supplementary Table 13.** DEGs in *FCRL4*<sup>+</sup> MBCs (B2) of ND or RR TFHL LNs compared  
415 with those of HLNs.

416 **Supplementary Table 14.** AITL B-specific gene set cited from Fujisawa et al. (2022) [1] for  
417 GSEA.

418 **Supplementary Table 15.** DEGs in *XCL1*<sup>+</sup> NK cells (NK1) of ND TFHL LNs compared with  
419 those of HLNs.

- 420 **Supplementary Table 16.** DEGs in *XCL1*<sup>+</sup> NK cells (NK1) of RR TFHL LNs compared with  
421 those of HLNs.
- 422 **Supplementary Table 17.** Antibodies used for IMC analysis.
- 423 **Supplementary Table 18.** Markers and annotation of each cluster for subclustering of non-  
424 malignant cells in IMC analysis.
- 425 **Supplementary Table 19.** Results of spatial interaction analysis.
- 426 **Supplementary Table 20.** Antibodies used for FCM analysis and IHC staining.

# Supplementary Figure 1

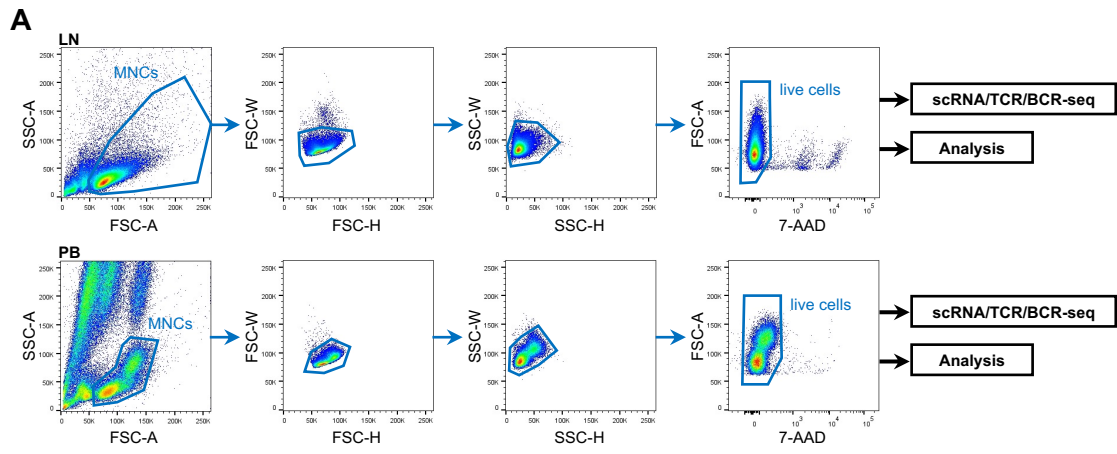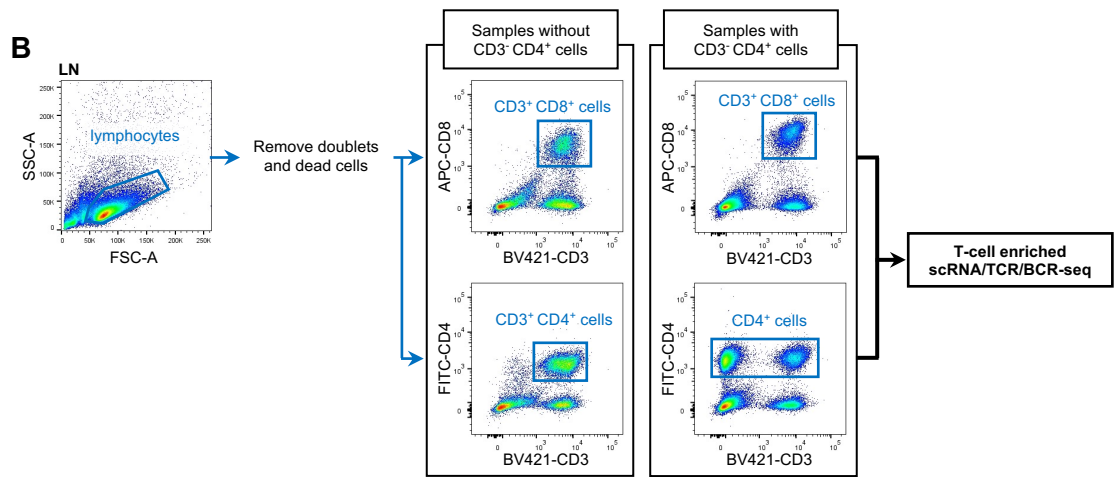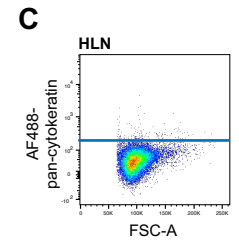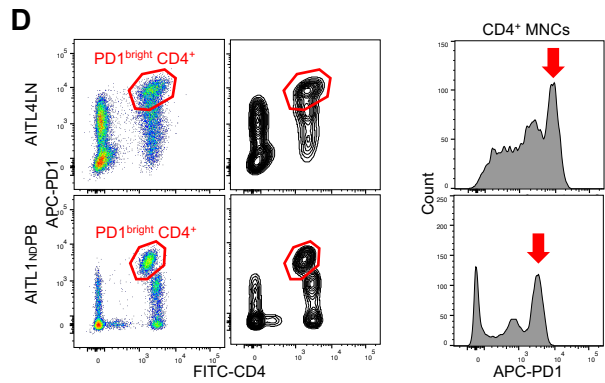

427 **Figure S1. Cell-surface protein expression analysis and sorting by flow cytometry (FCM)**

428 (A) Mononuclear cell (MNC) sorting of lymph node (LN) and peripheral blood (PB) samples.  
429 After removing doublets and dead cells by forward versus side scatter plot and 7-Amino-  
430 Actinomycin D (7-AAD) staining, MNCs were sorted, and library construction of single-cell  
431 RNA and T-/B-cell receptor (TCR/BCR) sequencing (scRNA/TCR/BCR-seq) or FCM analysis  
432 were performed. FSC, forward scatter; SSC, side scatter.

433 (B) CD4/CD8<sup>+</sup> T-cell sorting for T cell-enriched library. For samples in which tumor-  
434 containing CD3<sup>-</sup>CD4<sup>+</sup> cells were detected in the lymphocyte fraction in the initial analysis, CD3<sup>+</sup>  
435 CD8<sup>+</sup> cells and CD4<sup>+</sup> cells were sorted.

436 (C) Cytokeratin staining for homeostatic LNs (HLNs). Cytokeratin negativity confirmed the  
437 absence of tumor-cell contamination.

438 (D) Detection of tumor cells by surface antigen. Tumor cells were detected as a PD1<sup>bright</sup> CD4<sup>+</sup>  
439 T-cell population, as previously reported [47].

# Supplementary Figure 2

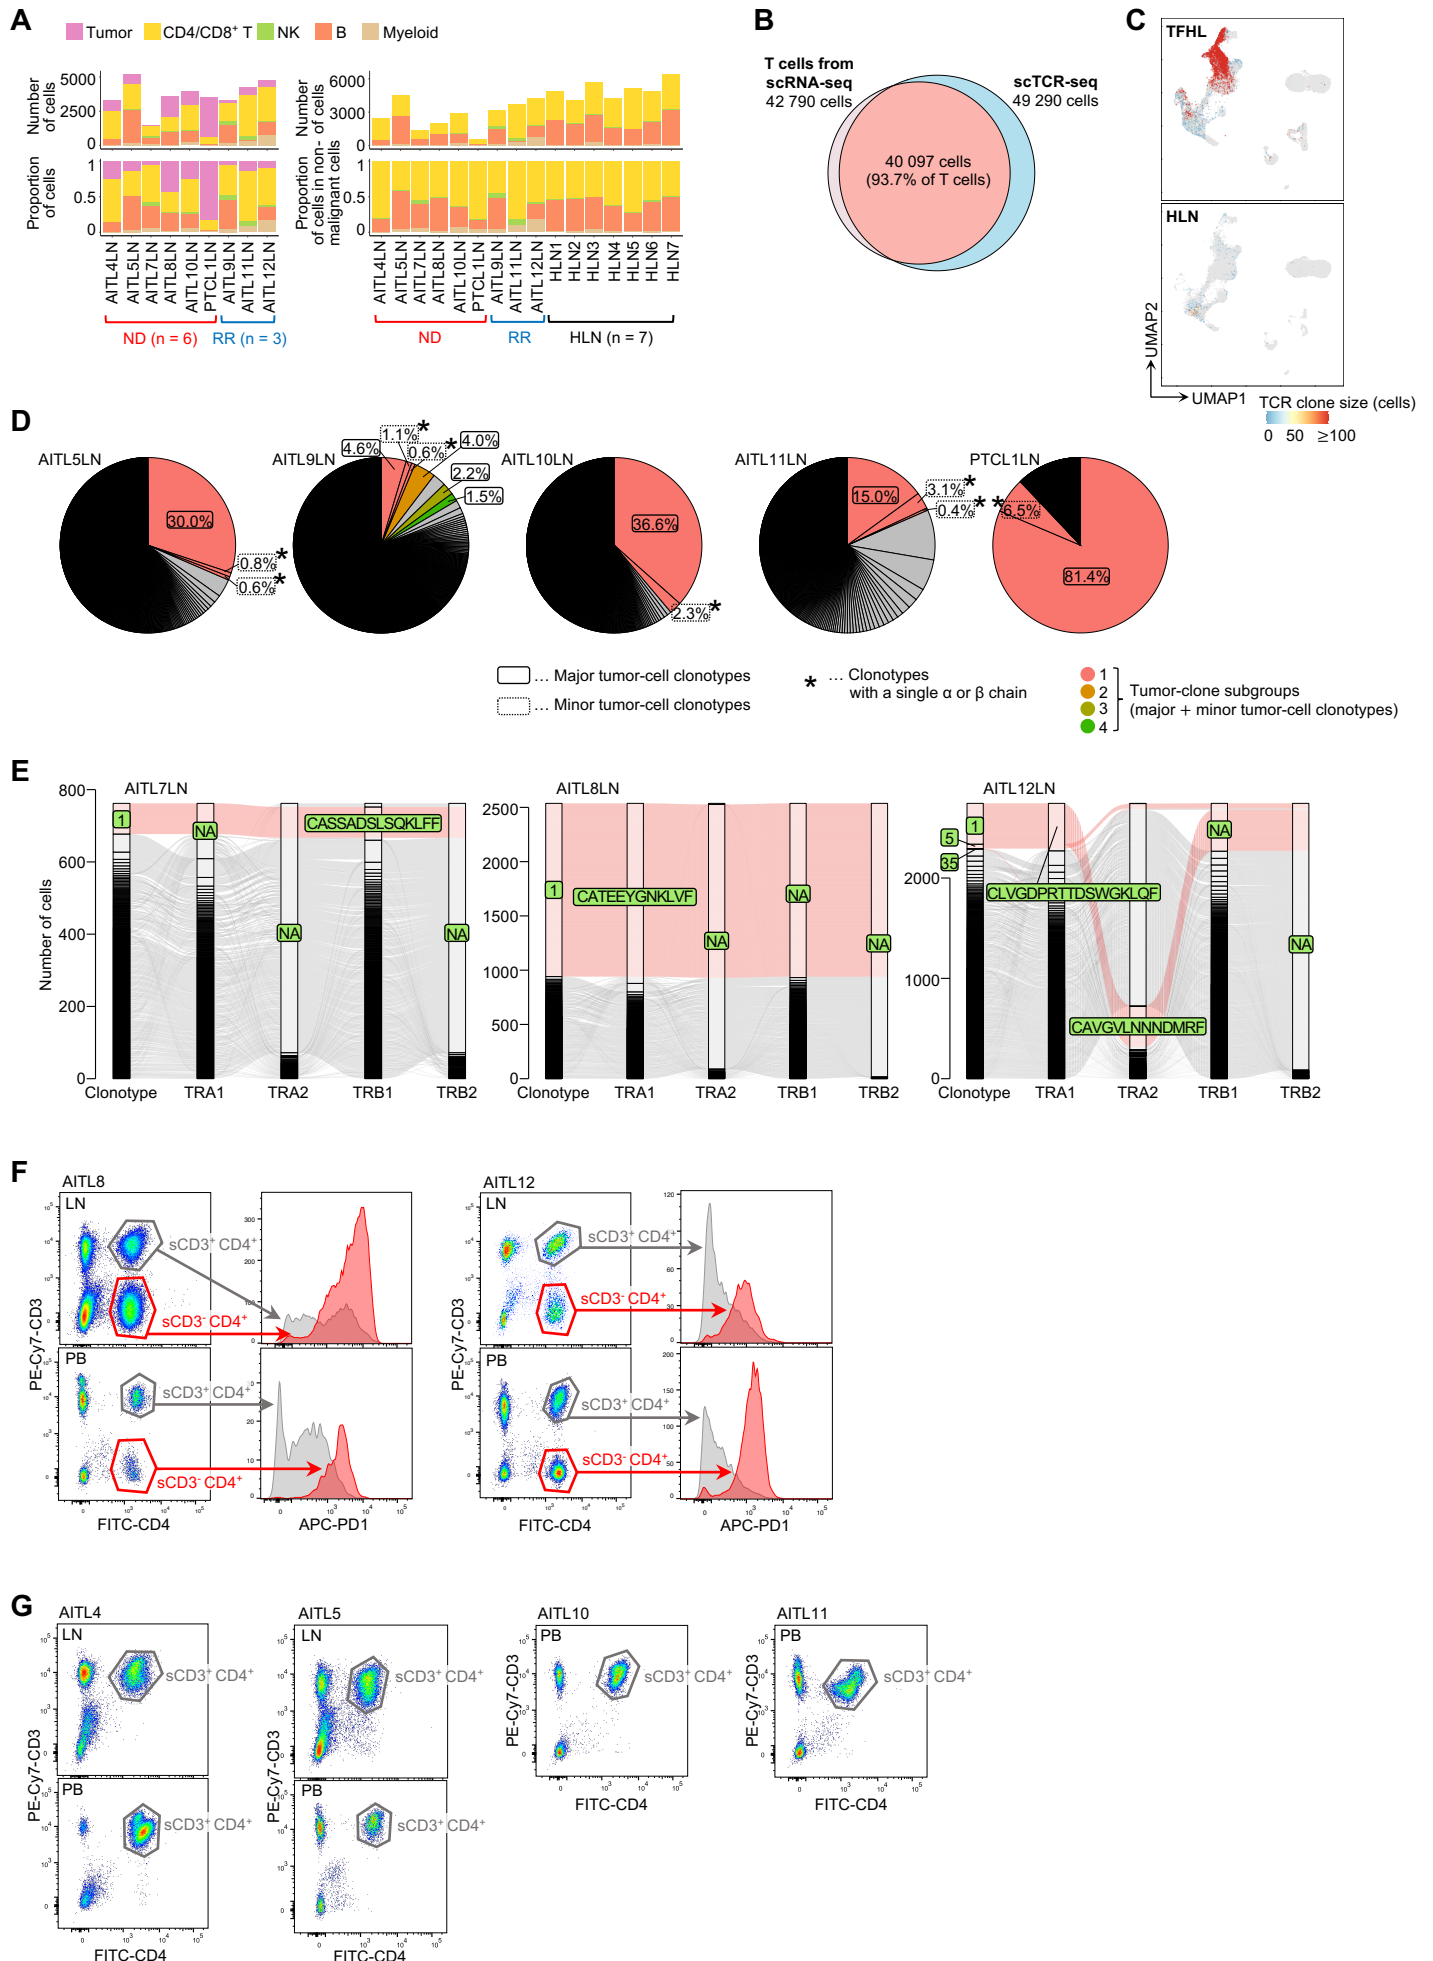

440 **Figure S2. Subclustering and TCR repertoire analysis of LN samples**

441 (A) Absolute number (top of panels) and proportion (bottom of panels) of cells within all LN  
442 MNCs (left panel) and non-malignant LN MNCs (right panel) for each sample, color-coded by  
443 cell types. B, B cell; CD4/CD8 T, CD4<sup>+</sup> and CD8<sup>+</sup> T cell; Myeloid, myeloid cell; NK, natural  
444 killer cell; ND, newly diagnosed T follicular helper cell lymphoma (TFHL); RR, relapsed or  
445 refractory TFHL; Tumor, tumor cell.

446 (B) Comparison between T cells from scRNA-seq data and TCRs from scTCR-seq data of LN  
447 samples.

448 (C) Clone size of TCRs in LNs. The number of cells expressing each clonotype was defined  
449 as clone size and illustrated for each cell.

450 (D) Pie charts of TCR clonotypes for each sample. Tumor clones are colored.

451 (E) Sankey plots of each clonotype in cases where the major tumor-cell clonotype was a TCR  
452 with a single chain. The major clonotypes are colored in red and green, showing the CDR3  
453 sequences per TCR chain. "NA" indicates that no TCR chain was detected. NA, not available;  
454 TRA, TCR alpha chain; TRB, TCR beta chain.

455 (F) Relationship between CD3<sup>-</sup> CD4<sup>+</sup> cells and the expression level of PD1 in each sample.  
456 CD3<sup>-</sup> CD4<sup>+</sup> (red) and CD3<sup>+</sup> CD4<sup>+</sup> (grey) populations detected by a CD3 versus CD4 plot (left  
457 panel) are plotted separately on a histogram of PD1 expression (right panel). Samples in which  
458 CD3<sup>-</sup> CD4<sup>+</sup> cells were detected by FCM analysis of LN samples are shown. sCD3 $\epsilon$ , surface CD3 $\epsilon$ .

459 (G) FCM plots of CD3 versus CD4 for TFHL patients without single-chain TCR expansion.  
460 Since LN samples from AITL10 and AITL11 were not available for detailed FCM analysis, only  
461 PB FCM data are shown for these patients.



# Supplementary Figure 3

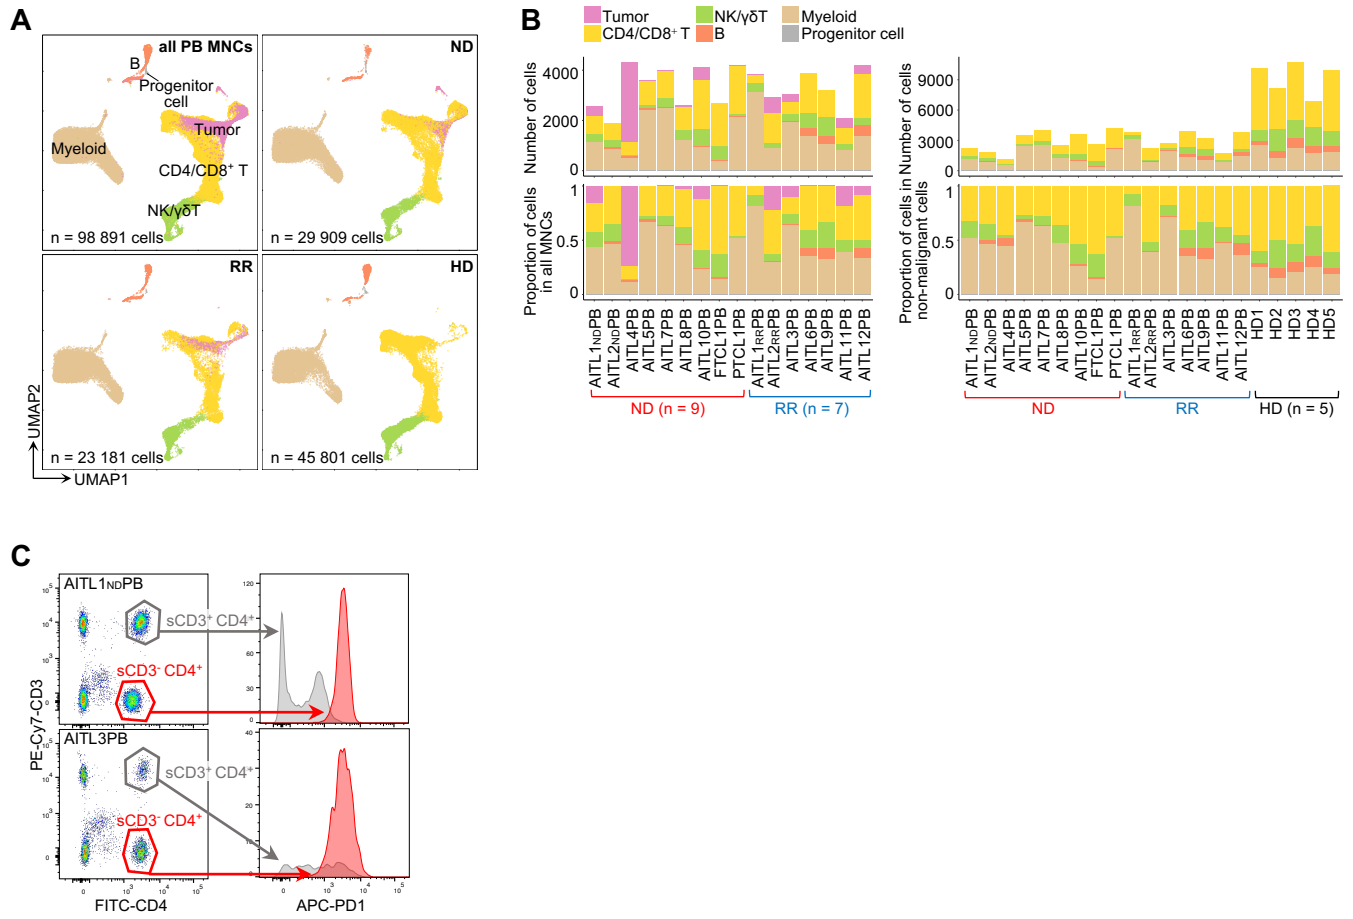

462 **Figure S3. Single-cell analysis of PB samples**

463 (A) Uniform Manifold Approximation and Projection for Dimension Reduction (UMAP) plots  
464 of all PB MNCs from 16 TFHL and 5 healthy donor (HD) PB samples, colored according to cell  
465 type (top left). Cells are shown separately for each clinical status (top right and bottom). NK/ $\gamma\delta$ T,  
466 natural-killer and gamma-delta T cell.

467 (B) Absolute number (top of panels) and proportion (bottom of panels) of cells within all PB  
468 MNCs (left panel) and non-malignant PB MNCs (right panel) for each sample, color-coded by  
469 cell types.

470 (C) Relationship between CD3<sup>-</sup> CD4<sup>+</sup> cells and the expression level of PD1 in PB samples.  
471 CD3<sup>-</sup> CD4<sup>+</sup> (red) and CD3<sup>+</sup> CD4<sup>+</sup> (grey) populations detected by a CD3 versus CD4 plot (left  
472 panel) are plotted separately on a histogram of PD1 expression (right panel). Samples in which  
473 CD3<sup>-</sup> CD4<sup>+</sup> cells were detected by FCM analysis of PB samples are shown.

# Supplementary Figure 4

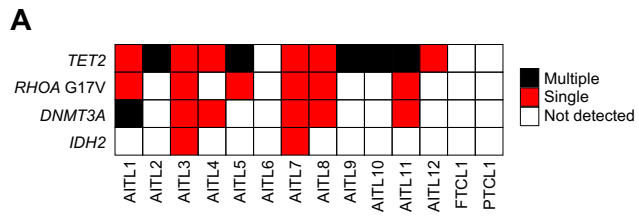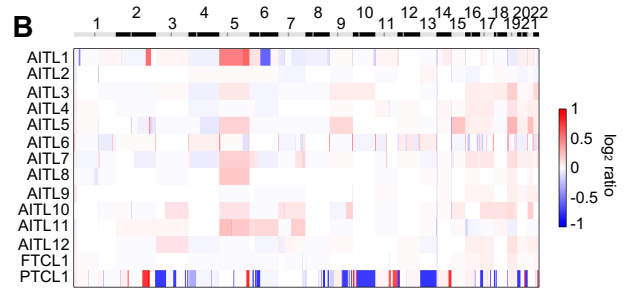

474 **Figure S4. Bulk genomic profiling of the 14 TFHL patients**

475 (A) Recurrent gene mutations detected by whole-exome sequencing (WES). Red squares  
476 indicate single mutations and black ones indicate multiple mutations.

477 (B) Copy number variation (CNV) analysis using WES data from tumor tissue samples.  
478 Significant CNVs were called by the Genome Analysis Tool Kit [34].

Supplementary Figure 5

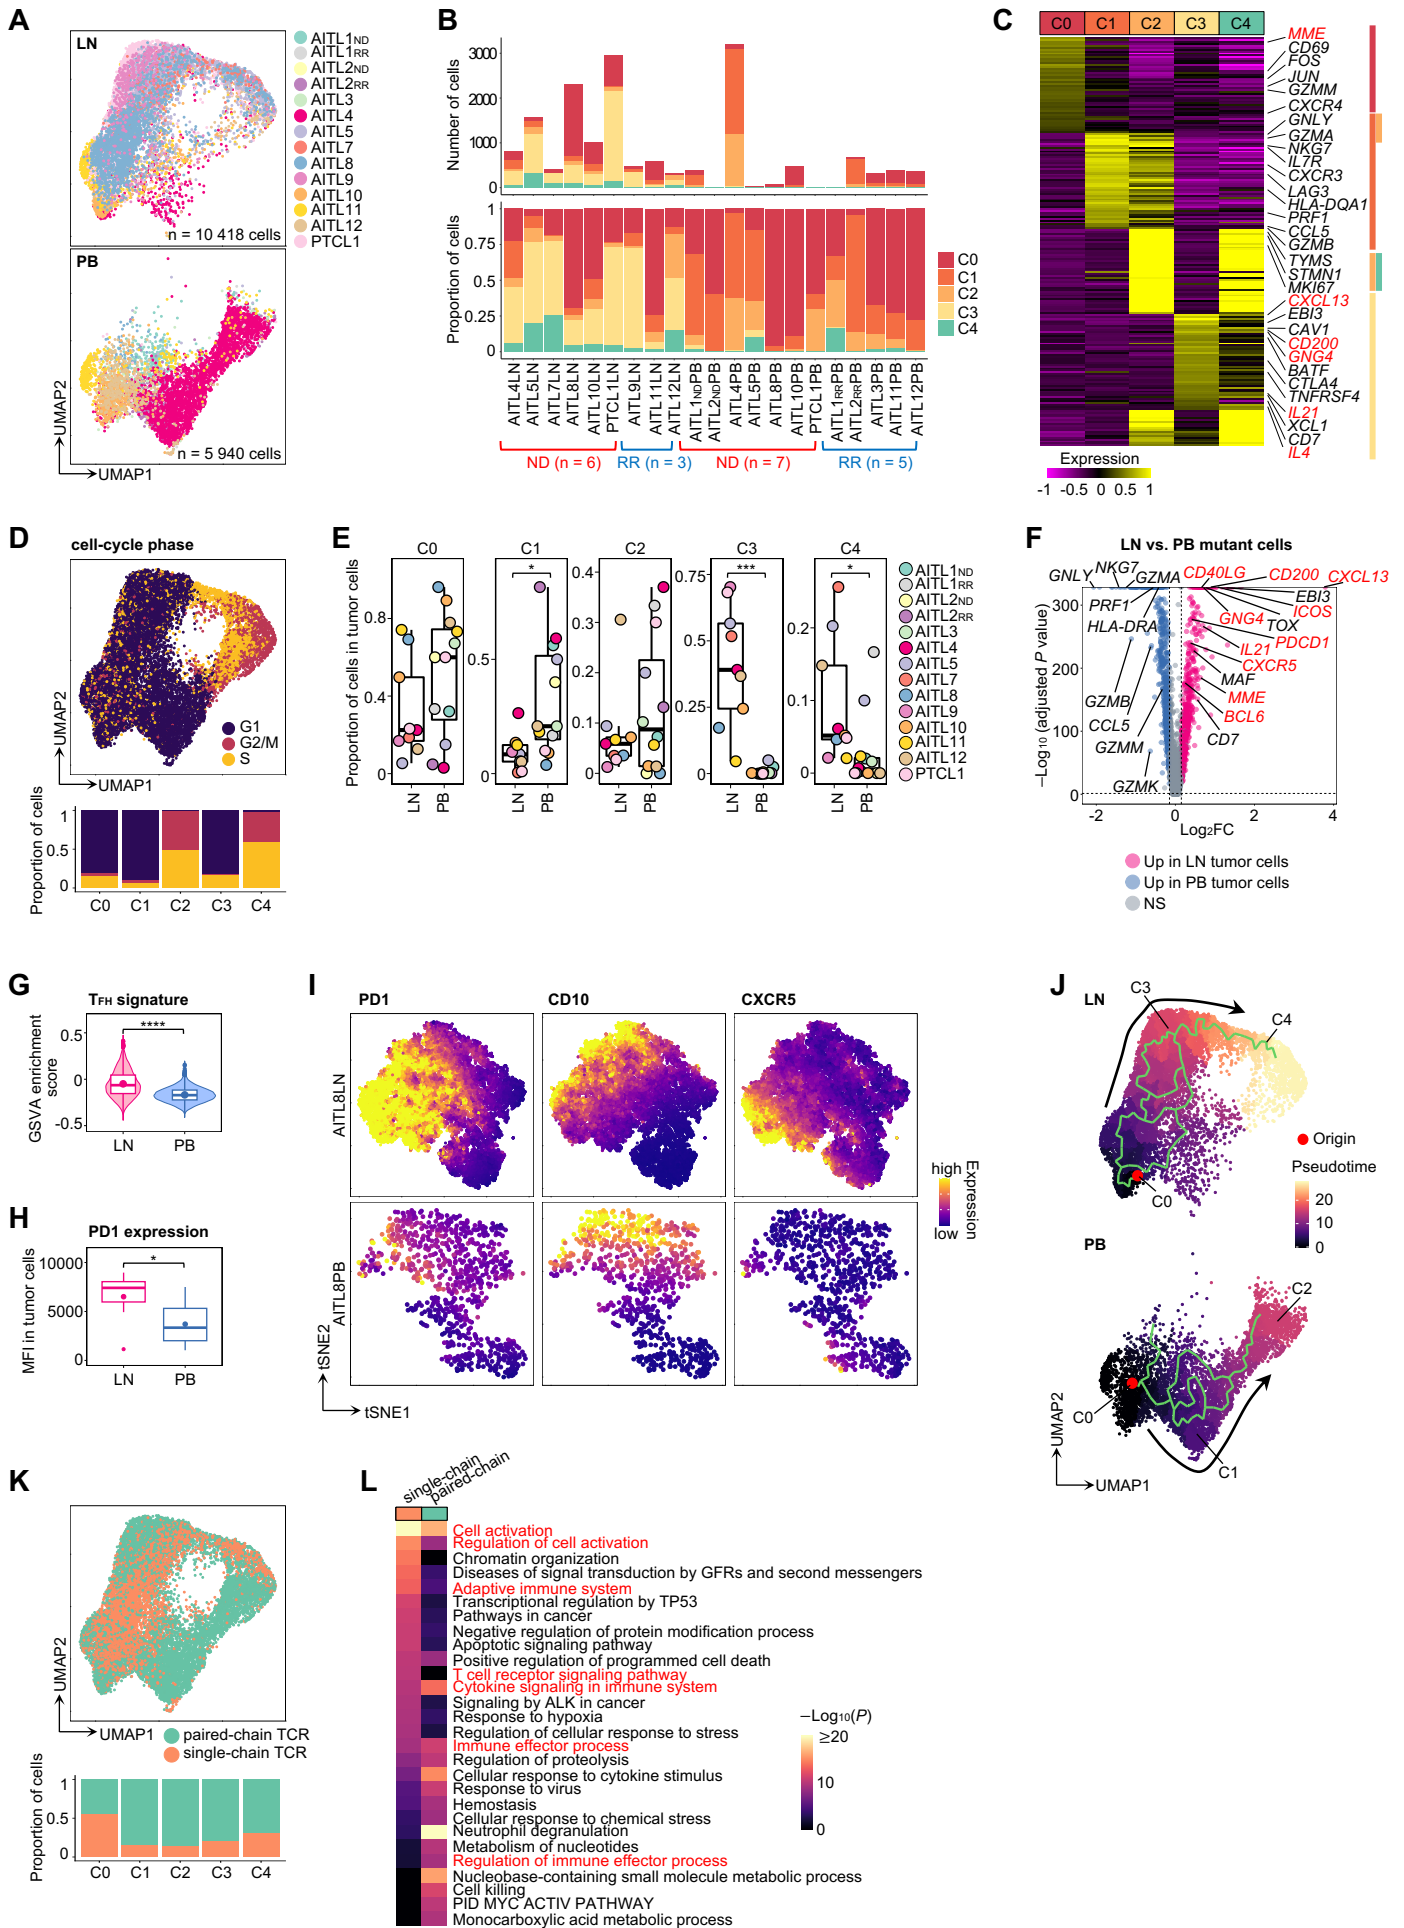

479 **Figure S5. Subclustering of tumor cells from LN and PB samples**

480 (A) UMAP plots of LN and PB tumor cell subclusters. Cells are color-coded by each sample  
481 and shown separately for each tissue.

482 (B) Absolute number (top) and proportion within all tumor cells (bottom) of cells for each  
483 sample, color-coded by tumor subclusters.

484 (C) Heatmap of the top 50 differentially expressed genes (DEGs) for each subcluster. T  
485 follicular helper ( $T_{FH}$ ) markers are shown in red.

486 (D) Feature plot showing estimation of cell cycle phase. Cell cycle score calculations were  
487 performed based on canonical markers using the “CellCycleScoring” function of Seurat, and each  
488 cell is colored according to the estimated cell cycle phase.

489 (E) Comparison of the proportion of each cluster in LN and PB tumor cells. The boxplots show  
490 the median (center line), interquartile range (box limits), minimum to max values (whiskers), and  
491 samples (dots) for each group. *P*-values are shown only when there is a significant difference.

492 (F) Volcano plot of DEGs between LN (pink) and PB (blue) tumor cells. NS, not significant;  
493 vs., versus.

494 (G) Comparison of gene set variation analysis (GSVA) enrichment score for  $T_{FH}$  signature in  
495 LN (pink) and PB (blue) tumor cells. The boxplots show the median (center line), mean (center  
496 dot), interquartile range (box limits), and minimum to max values (whiskers) for each group.

497 (H) Comparison of PD1 expression levels by FCM in LN (pink) and PB (blue) tumor cells.  
498 Tumor cells were detected as a  $PD1^{bright} CD4^{+}$  T cell population by FCM [47]. The boxplots show  
499 the median (center line), mean (center dot), interquartile range (box limits), and minimum to max  
500 values (whiskers) for each group. MFI, median fluorescence intensity.

501 (I) t-Distributed Stochastic Neighbor Embedding (t-SNE) plots of FCM analysis for tumor  
502 cells of AITL&LN (top) and AITL&PB (bottom), colored by the expression levels of  $T_{FH}$  markers

503 (PD1, CD10, and CXCR5).

504 (J) Trajectory analysis by Monocle3 [27] for LN (top) and PB (bottom) tumor cells. The red  
505 points were set as the origins of trajectory.

506 (K) UMAP plot showing tumor cells with paired-chain (green) and single-chain (orange) TCRs  
507 (top) and their proportions in each cluster (bottom).

508 (L) Heatmap of gene ontology (GO) analysis of tumor cells with paired-chain (green) and  
509 single-chain (orange) TCRs.

510  $*P < 5.0 \times 10^{-2}$ ,  $***P < 1.0 \times 10^{-3}$ ,  $****P < 1.0 \times 10^{-4}$ .

# Supplementary Figure 6

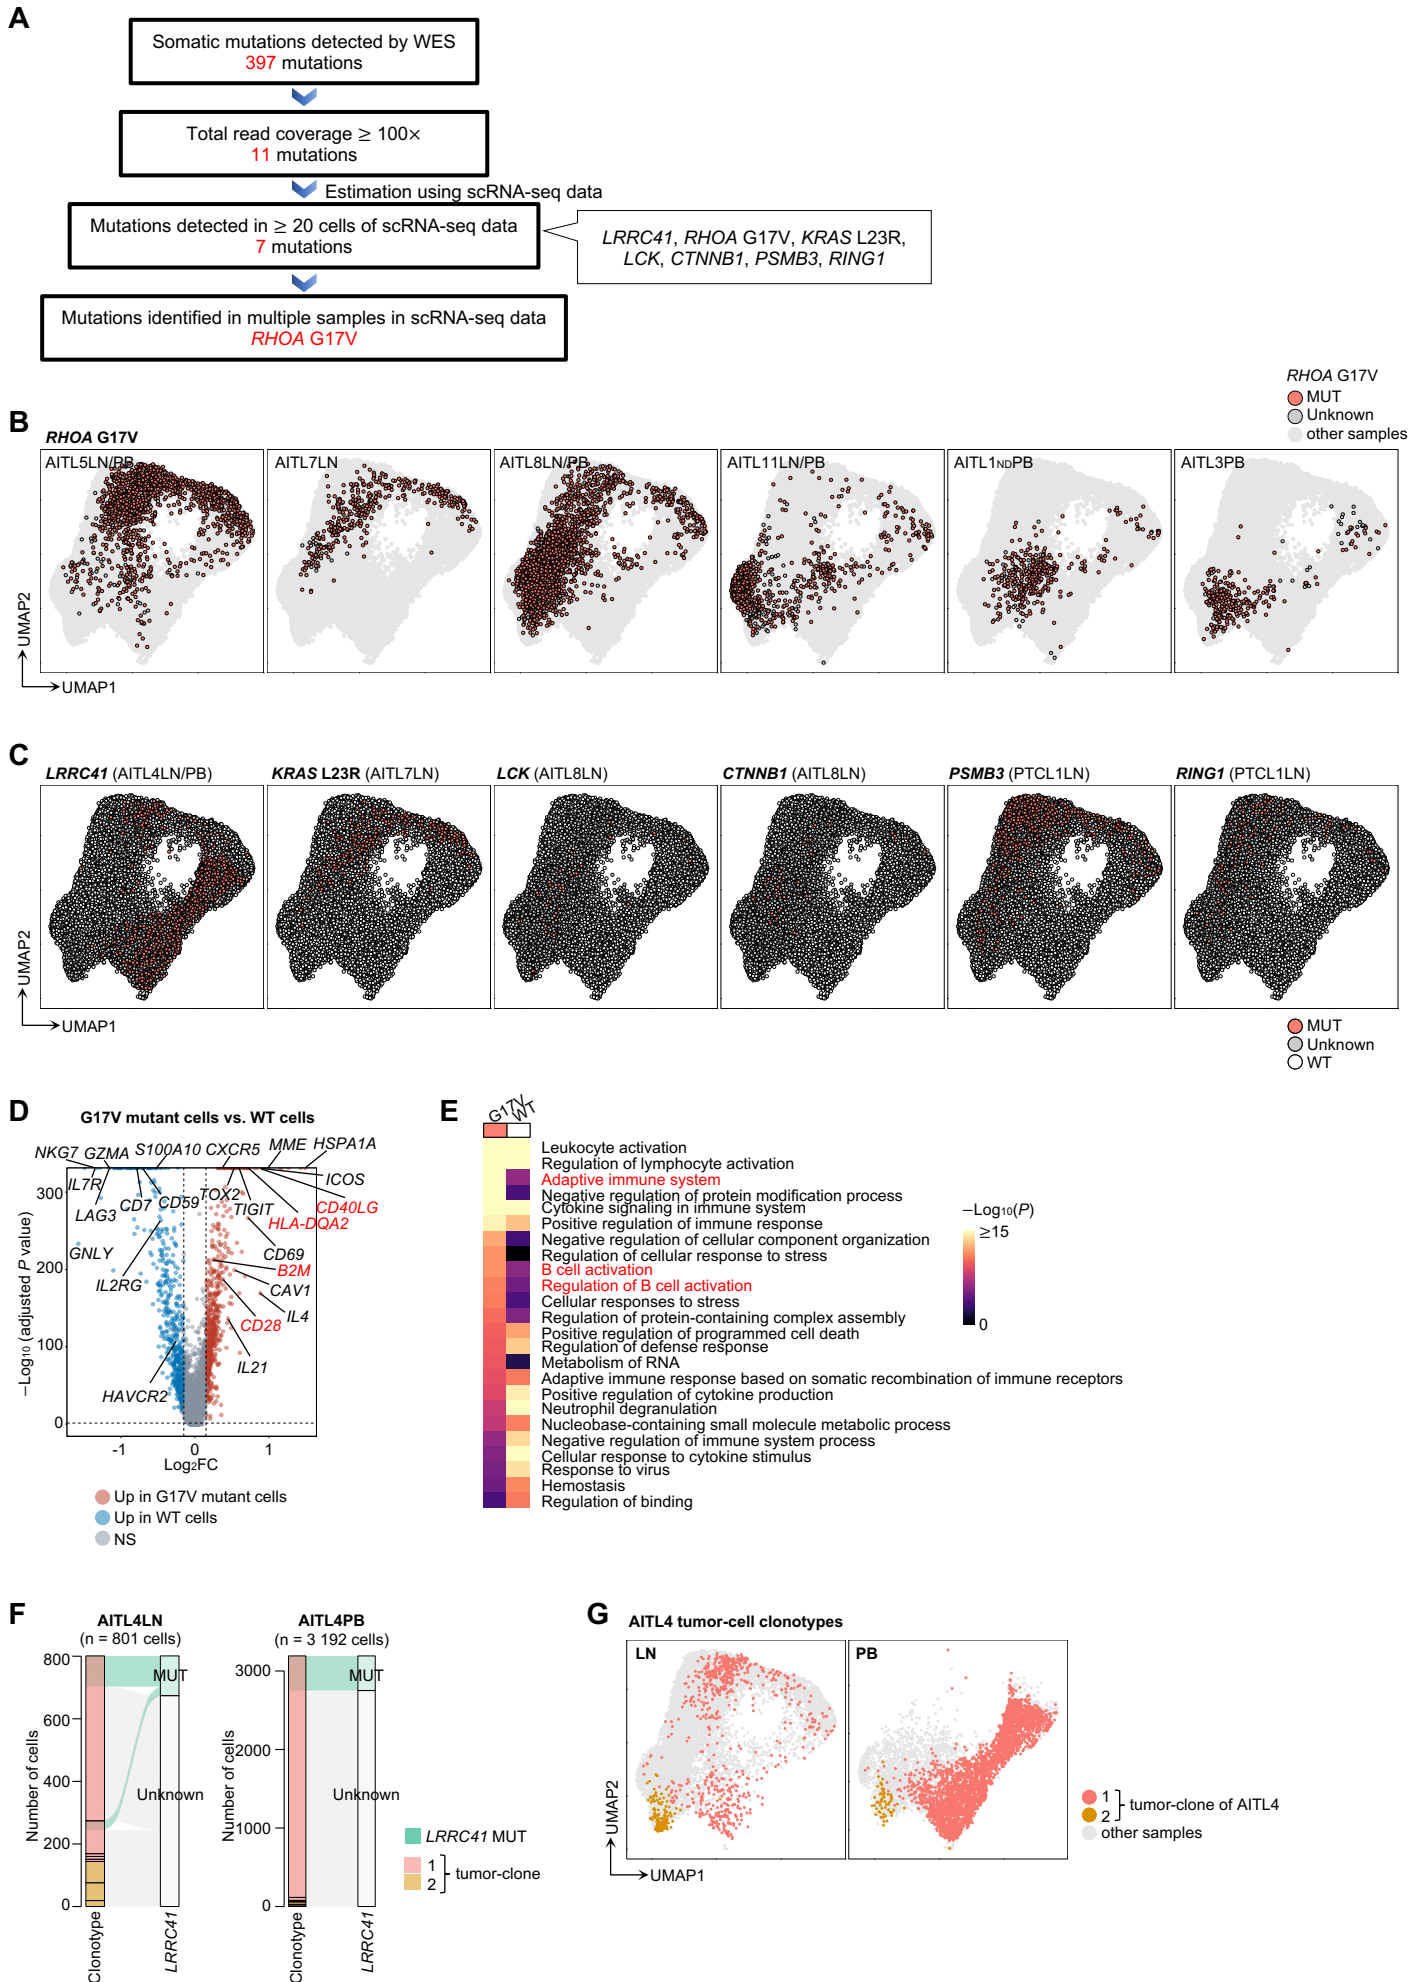



511 **Figure S6. Estimation of genetic mutations using single-cell data**

512 (A) Overview of reanalysis of somatic mutations using scRNA-seq data.

513 (B) Distribution of *RHOA* G17V (G17V) for each sample in LN and PB tumor cells. MUT,  
514 mutant cells; Unknown, cells with no mutant reads or no coverage.

515 (C) Distribution of detectable mutations other than G17V (*LRRC41*, *KRAS* L23R, *LCK*,  
516 *CTNNB1*, *PSMB3*, and *RING*) in LN and PB tumor cells. The sample names in parentheses show  
517 the samples in which the mutations were detected. WT, wild-type cells.

518 (D) Volcano plot of DEGs between G17V mutant (red) and WT (blue) cells in LN and PB  
519 tumor cells. G17V unknown cells were removed from the analysis.

520 (E) Heatmap of GO analysis of G17V mutant (red) and WT (white) tumor cells.

521 (F) Relationship between *LRRC41* mutant cells and their clonotypes in AITL4LN/PB tumor  
522 cells. In the Sankey plot, tumor clones of AITL4 and *LRRC41* mutant cells (green) are colored.

523 (G) UMAP plot showing the distribution of AITL4 tumor clones.

# Supplementary Figure 7

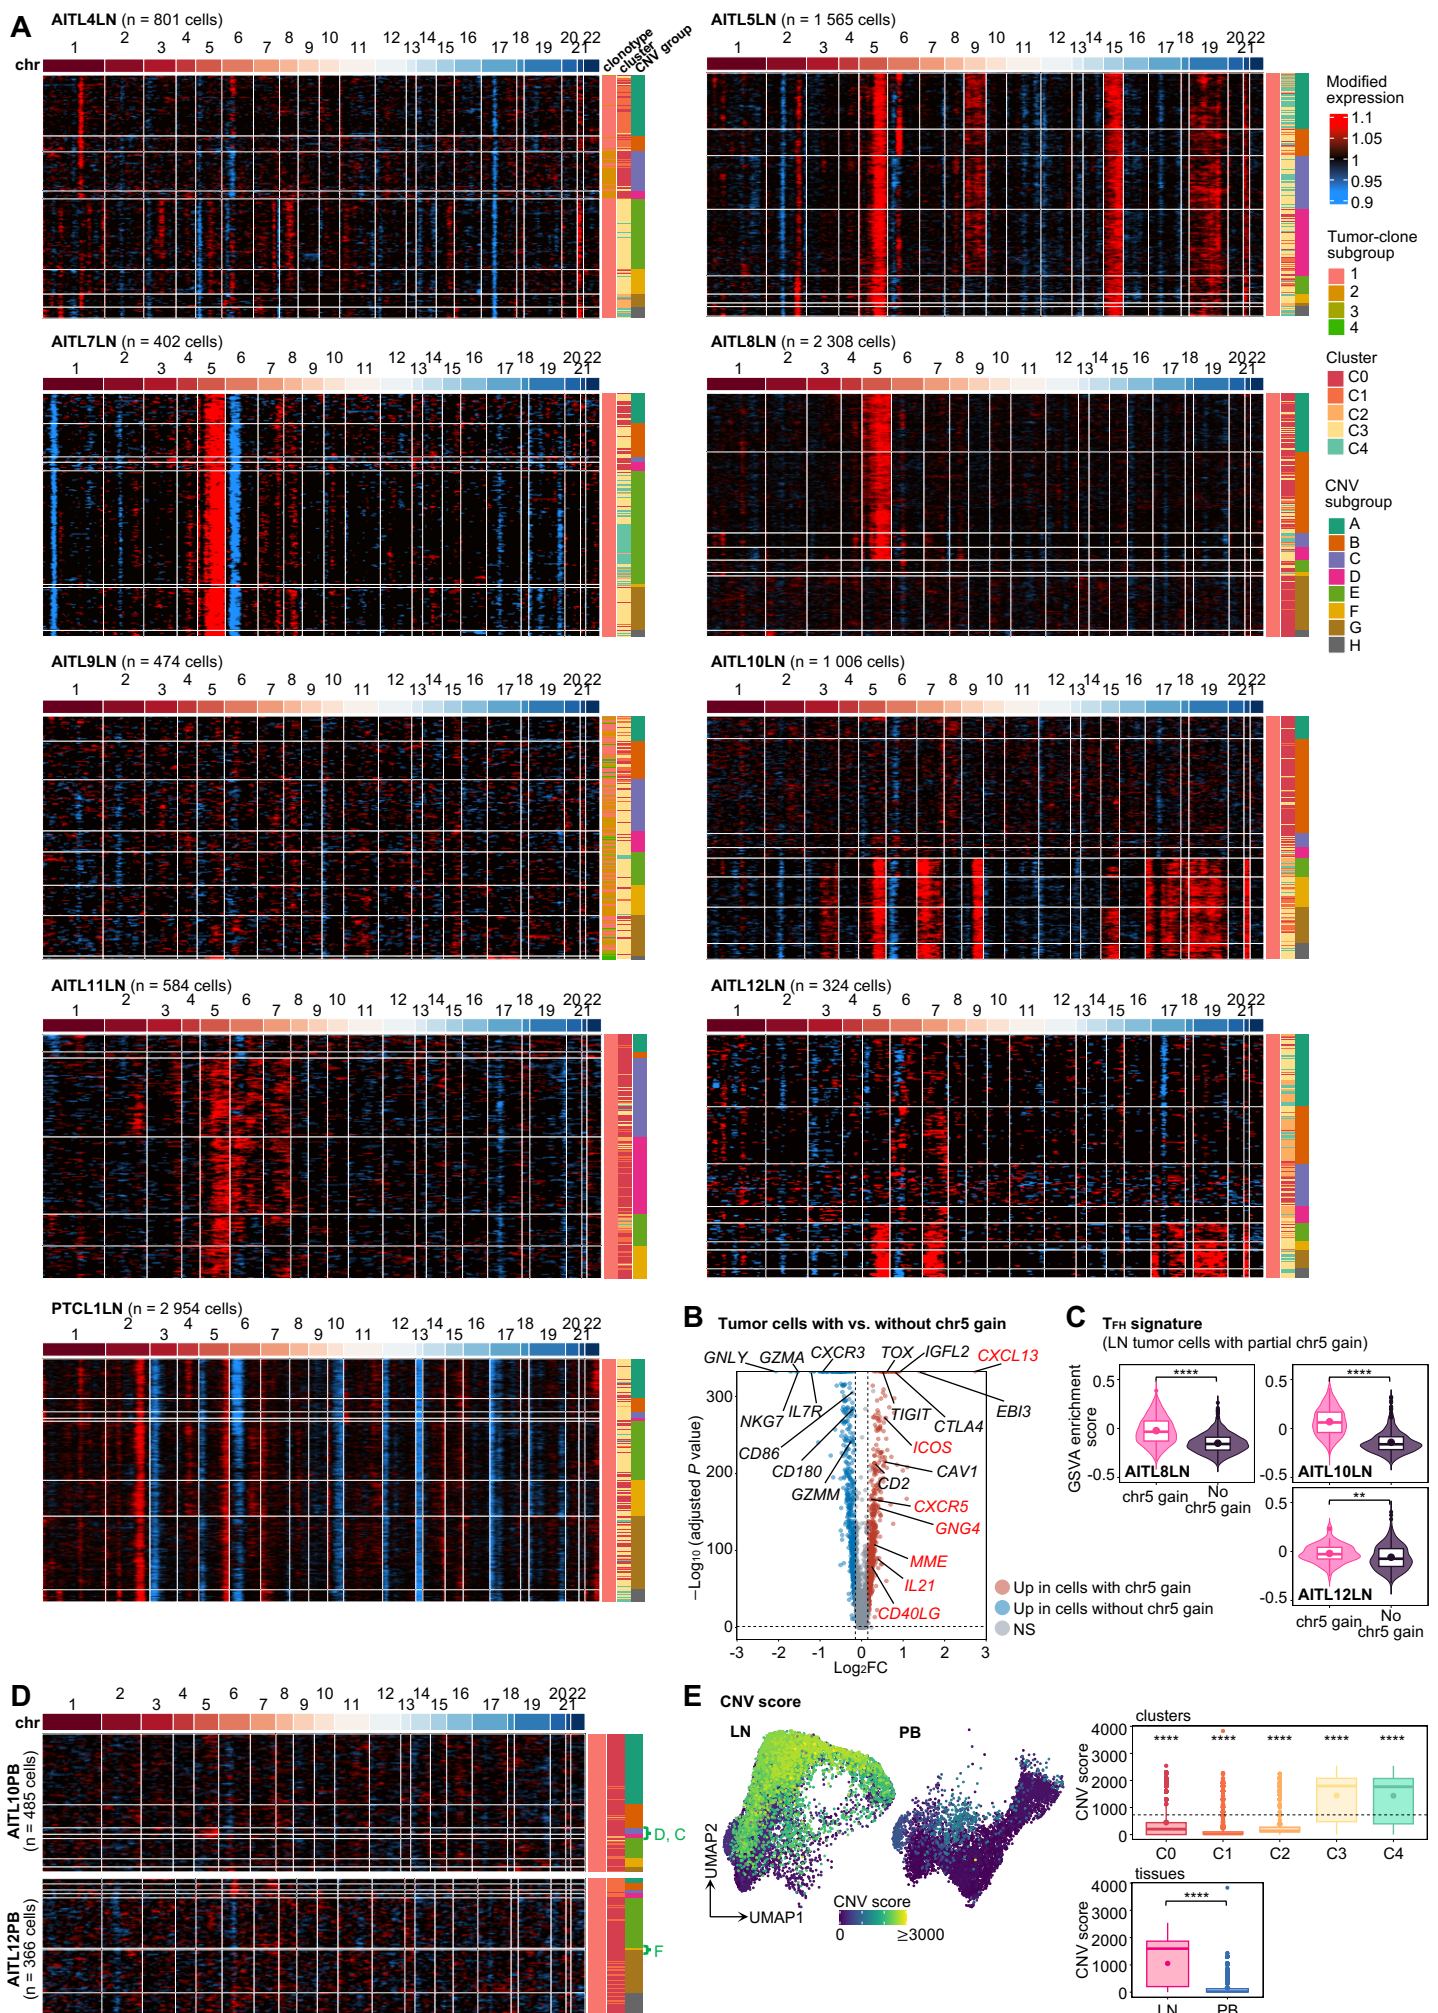

524 **Figure S7. Inferring CNVs using single-cell data**

525 (A) Heatmaps of estimated CNVs for LN tumor cells by inferCNV [36]. Right bars represent  
526 tumor clones, subclusters of tumor cells, and subgroups based on CNV patterns, respectively. chr,  
527 chromosome.

528 (B) Volcano plot of DEGs between tumor cells with chr5 gain (red) and those without (blue).

529 (C) Comparison of GSVA enrichment score for the T<sub>FH</sub> signature between tumor cells with  
530 chr5 gain (pink) and those without (blue) in TFHL LNs with partial chr5 gain.

531 (D) Heatmaps of estimated CNVs for PB tumor cells in AITL10 and AITL12.

532 (E) Distribution (left) and comparison for each cluster (top right) or tissue (bottom right) of  
533 CNV scores estimated using scRNA-seq data. In the boxplots of the top right panel, the dotted  
534 line represents the mean CNV scores across all clusters and adjusted *P*-values are calculated by  
535 the pairwise Wilcoxon test for each cluster against the mean value of all clusters.

536 All boxplots show the median (center line), mean (center dot), interquartile range (box limits),  
537 and minimum to max values (whiskers) for each group. \*\**P* < 1.0 × 10<sup>-2</sup>, \*\*\*\**P* < 1.0 × 10<sup>-4</sup>.

Supplementary Figure 8

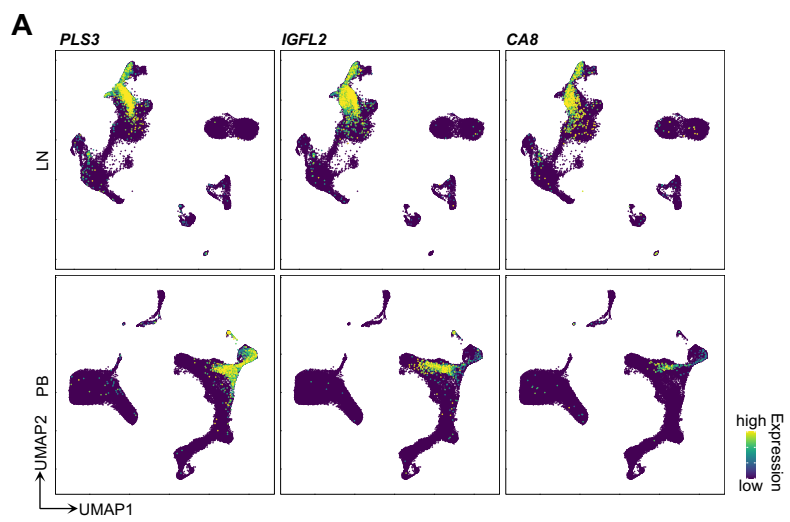

538 **Figure S8. Identification of novel tumor-specific cell markers**

539 (A) Feature plots of candidate marker genes in all LN (top) and PB (bottom) MNCs.

# Supplementary Figure 9

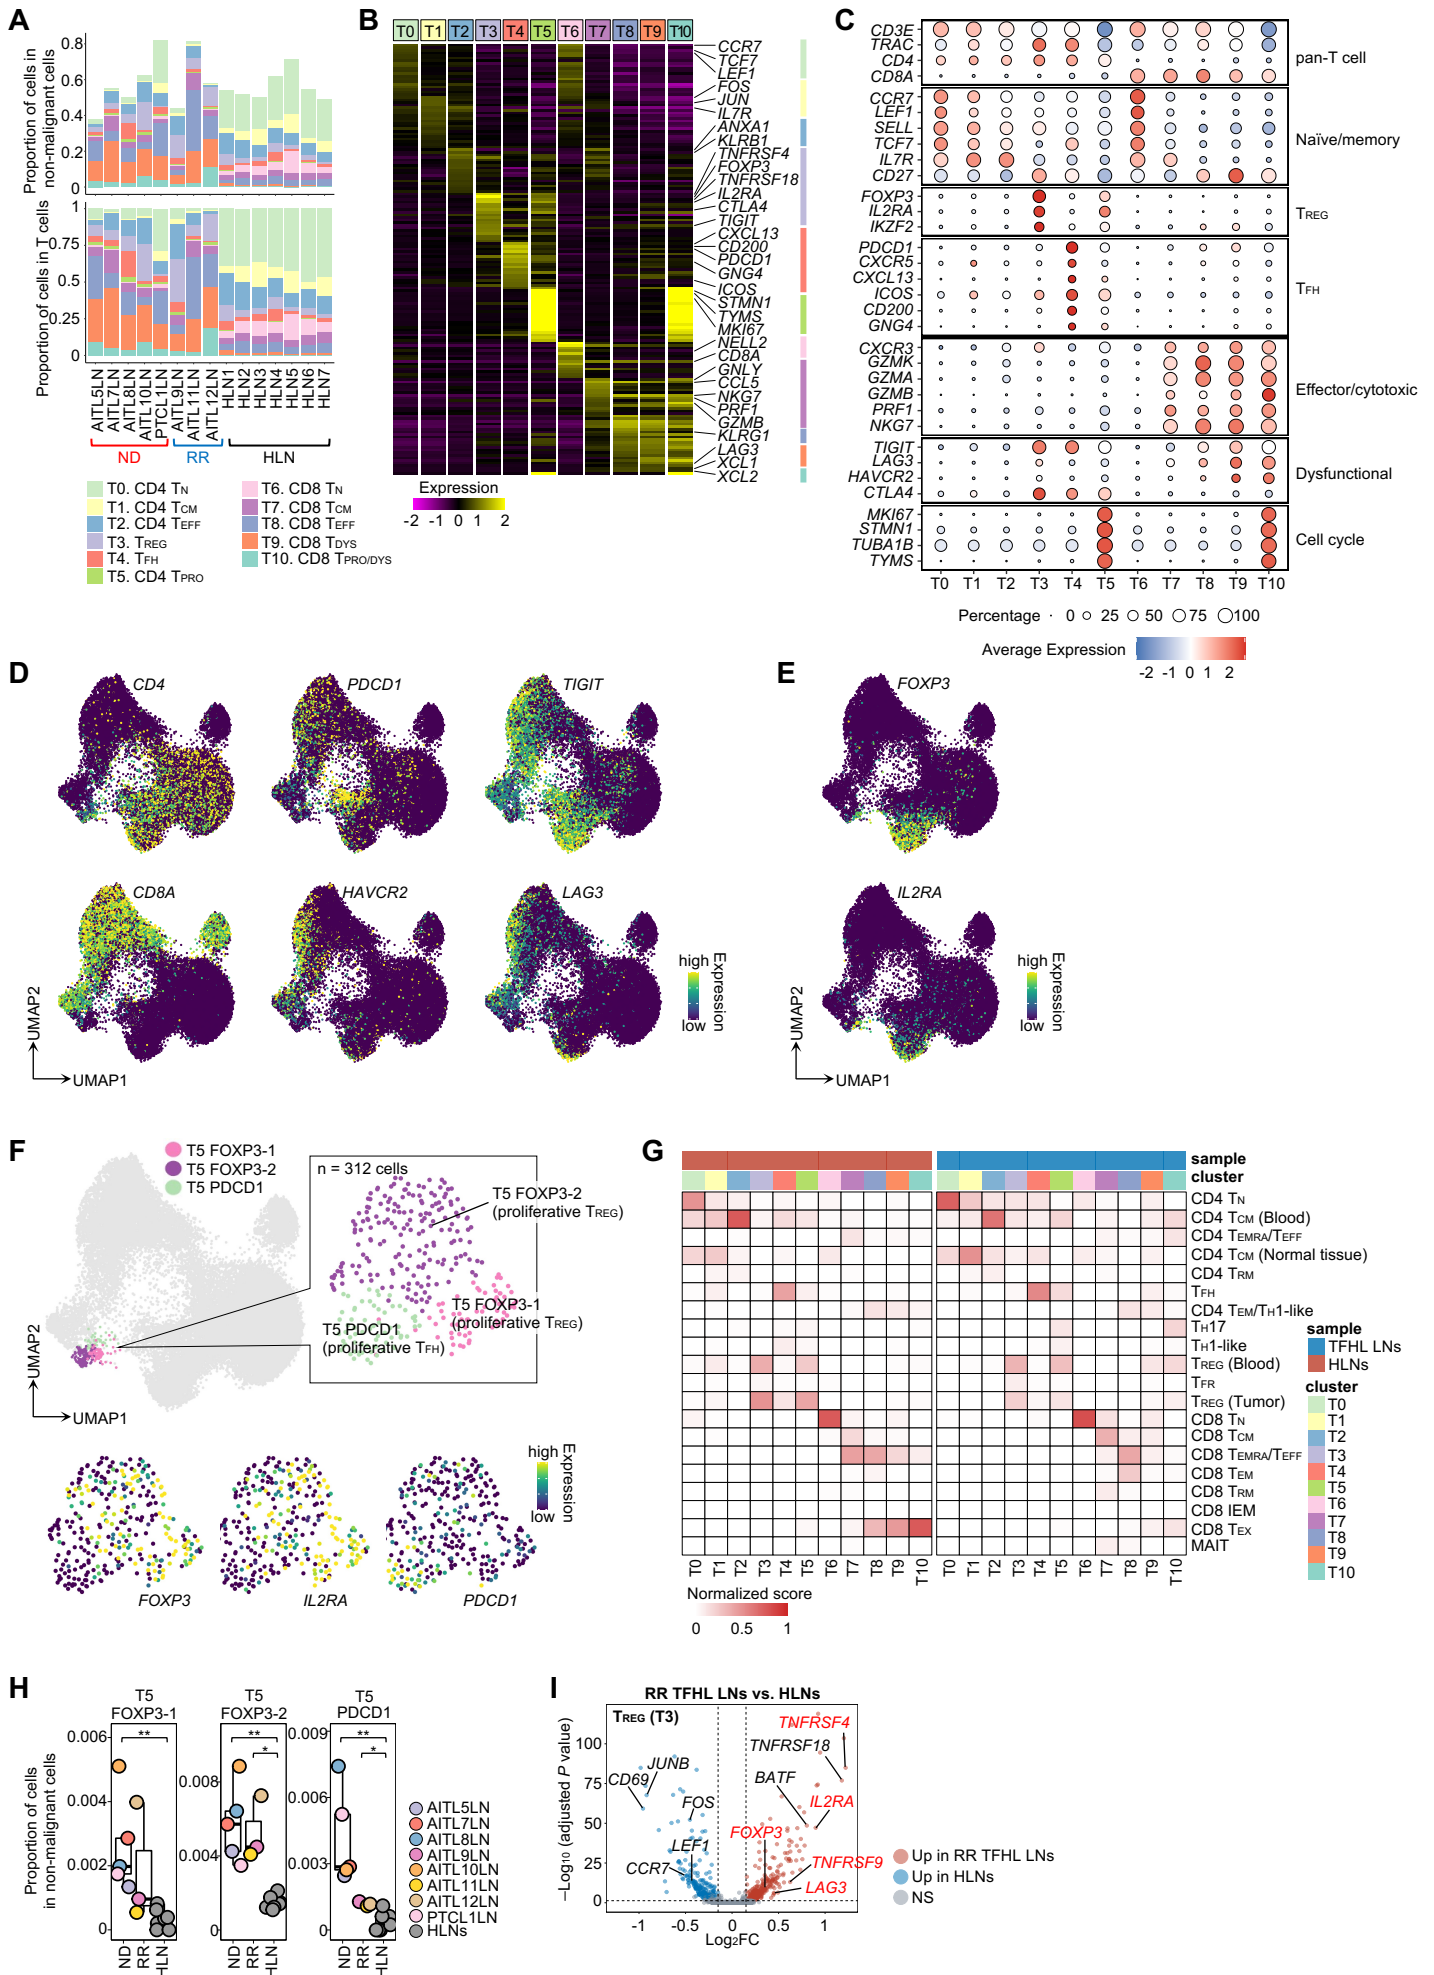

540 **Figure S9. Annotation of subclusters of non-malignant LN T cells**

541 (A) Proportion of each cluster within non-malignant MNCs (top) and within non-malignant T  
542 cells (bottom) for each sample. T<sub>CM</sub>, central memory T cell; T<sub>DYS</sub>, dysfunctional T cell; T<sub>EFF</sub>,  
543 effector T cell; T<sub>N</sub>, naïve T cell; T<sub>PRO</sub>, proliferative T cell; T<sub>PRO/DYS</sub>, proliferative dysfunctional T  
544 cell; T<sub>REG</sub>, regulatory T cell.

545 (B) Heatmap of the top 20 DEGs for each cluster of non-malignant LN T cells.

546 (C) Average expression per cluster of selected markers for cell-type annotation in non-  
547 malignant LN T cells.

548 (D) Feature plots of dysfunctional T-cell markers.

549 (E) Feature plots of T<sub>REG</sub> markers.

550 (F) Subclustering of the CD4 T<sub>PRO</sub> (T5) cluster. UMAP plot (top) and feature plots of T<sub>REG</sub> and  
551 T<sub>FH</sub> markers (bottom).

552 (G) Cell-type estimation scores by SingleR [13] using previously published single-cell data as  
553 a reference [48] for each subcluster of non-malignant T cells.

554 (H) Comparison of proportions of each subcluster of CD4 T<sub>PRO</sub> in non-malignant MNCs of  
555 each sample. The boxplots show the median (center line), interquartile range (box limits),  
556 minimum to max values (whiskers), and samples (dots) for each group. *P*-values are shown only  
557 for significant differences. \**P* < 5.0 × 10<sup>-2</sup>, \*\**P* < 1.0 × 10<sup>-2</sup>.

558 (I) Volcano plot of DEGs in T<sub>REG</sub> from RR TFHL LNs (red) and those from HLNs (blue).

# Supplementary Figure 10

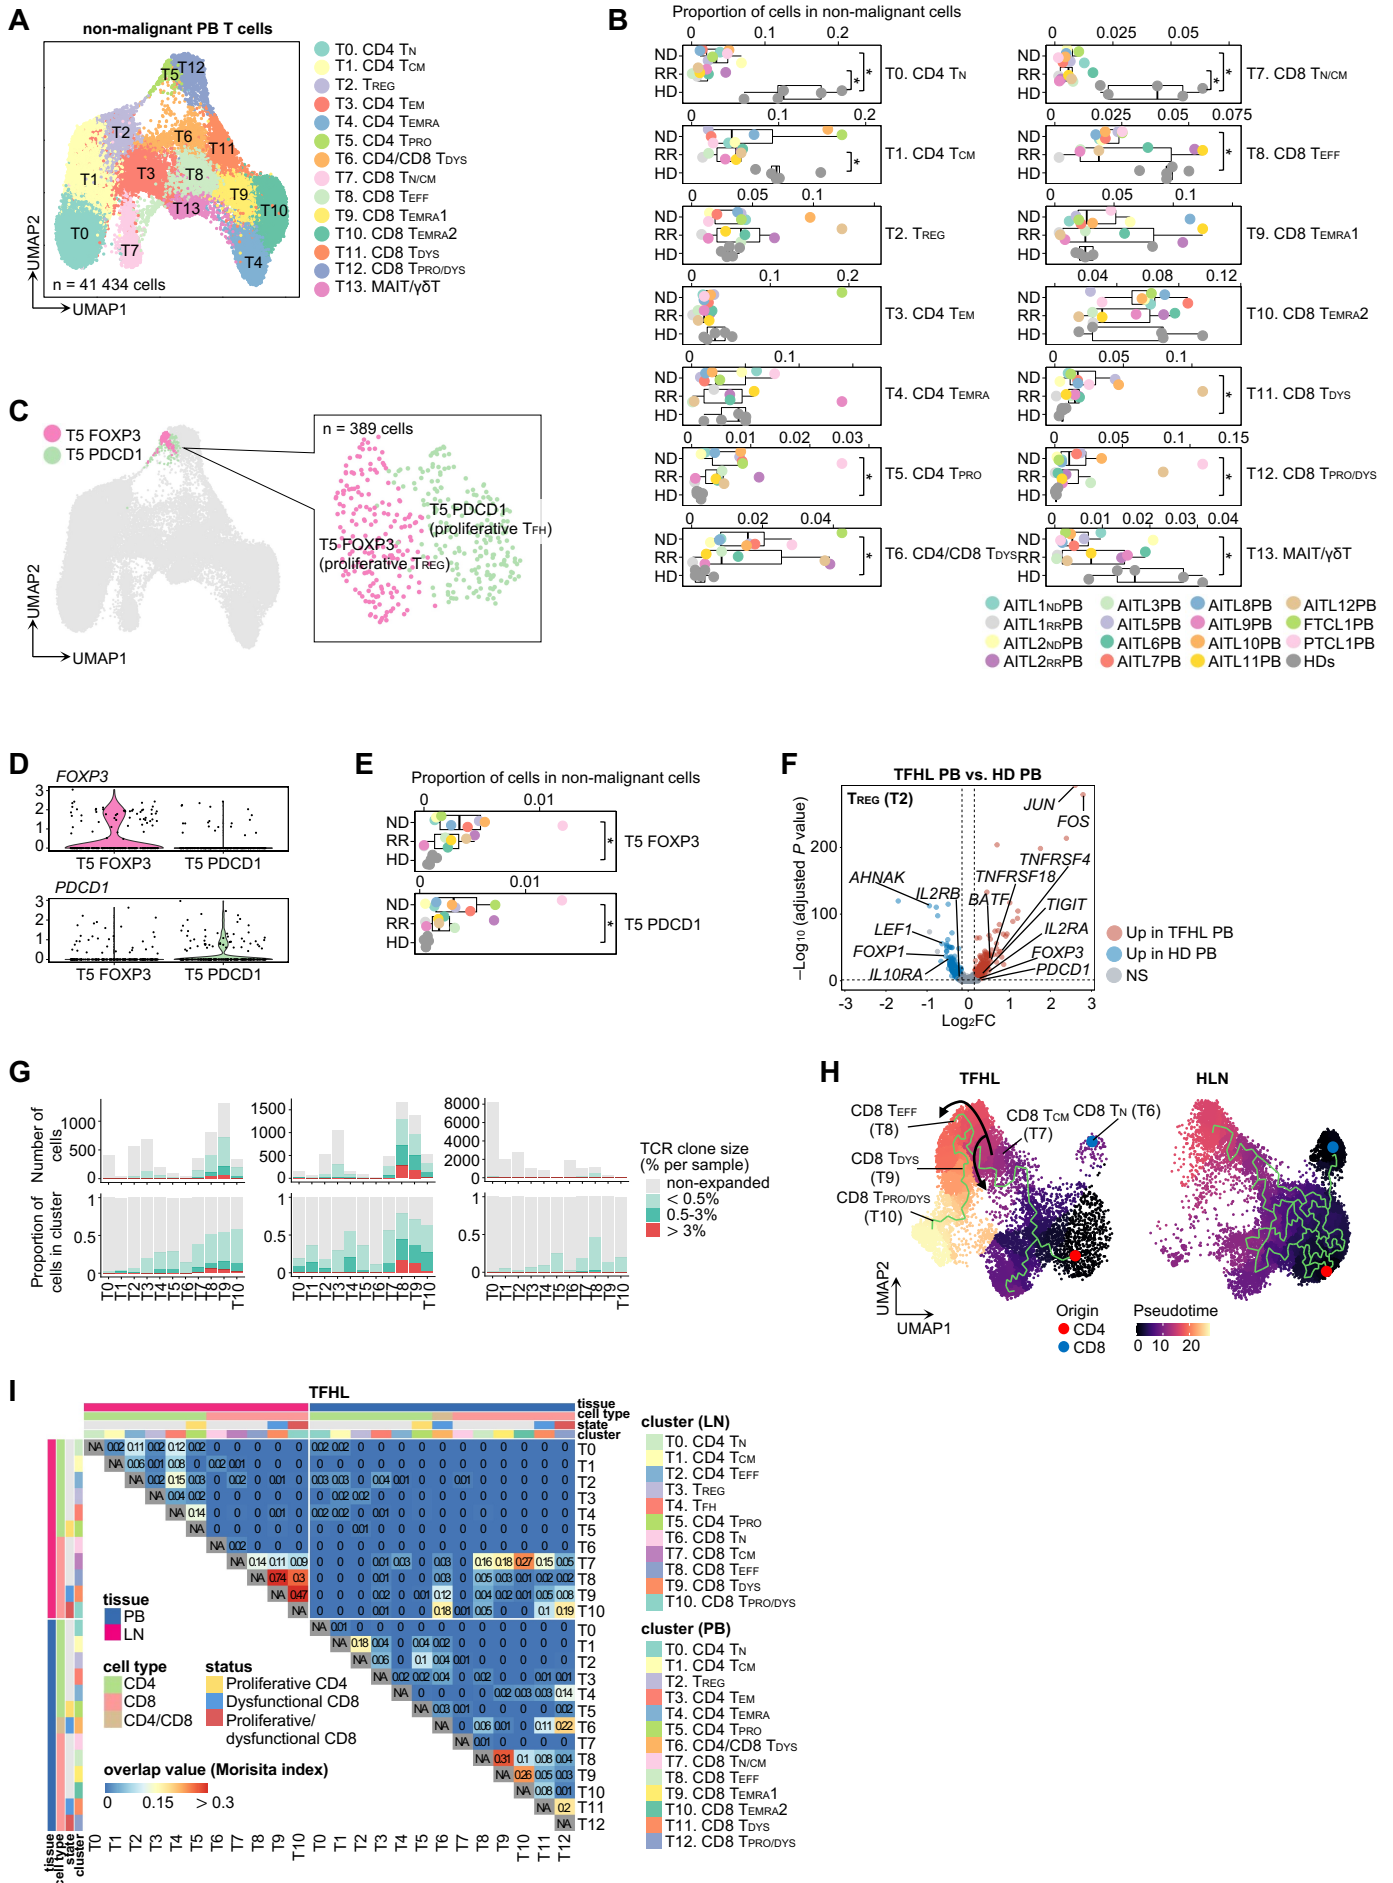



559 **Figure S10. Subclustering of non-malignant PB T cells and non-malignant TCR repertoire**  
560 **analysis**

561 (A) UMAP plot of non-malignant PB T-cell subclusters. MAIT/ $\gamma\delta$ T, mixture of mucosal-  
562 associated invariant T cells and gamma-delta T cells; T<sub>EM</sub>, effector memory T cell; T<sub>EMRA</sub>, effector  
563 memory T cells re-expressing CD45RA; T<sub>N/CM</sub>, mixture of naïve T cells and memory T cells.

564 (B) Comparison of proportions of each cluster in non-malignant MNCs of each sample. *P*-  
565 values are shown only for significant differences.

566 (C,D) Subclustering of CD4 T<sub>PRO</sub> (T5) cluster from non-malignant PB T cells. UMAP plot (C)  
567 and expression levels of *FOXP3* and *PDCDI* (D).

568 (E) Comparison of proportions of each T5 subcluster in non-malignant MNCs of each sample.  
569 *P*-values are shown only for significant differences.

570 (F) Volcano plot of DEGs between PB T<sub>REG</sub> of TFHL patients and those of HDs.

571 (G) Clone size of TCRs in non-malignant LN T cells. The proportion of each clonotype in all  
572 TCRs of non-malignant T cells was calculated for each sample and shown separately for each  
573 cluster. Non-expanded, clonotypes were expressed in < 2 cells.

574 (H) Trajectory analysis by Monocle3 [27] for non-malignant LN T cells. The red and blue  
575 points were set as the origin of CD4<sup>+</sup> and CD8<sup>+</sup> T cells, respectively.

576 (I) TCR overlap analysis between LN (pink) and PB (blue) non-malignant T cells of TFHL  
577 patients.

578 All boxplots show the median (center line), interquartile range (box limits), minimum to max  
579 values (whiskers), and samples (dots) for each group. \**P* < 5.0 × 10<sup>-2</sup>.

Supplementary Figure 11

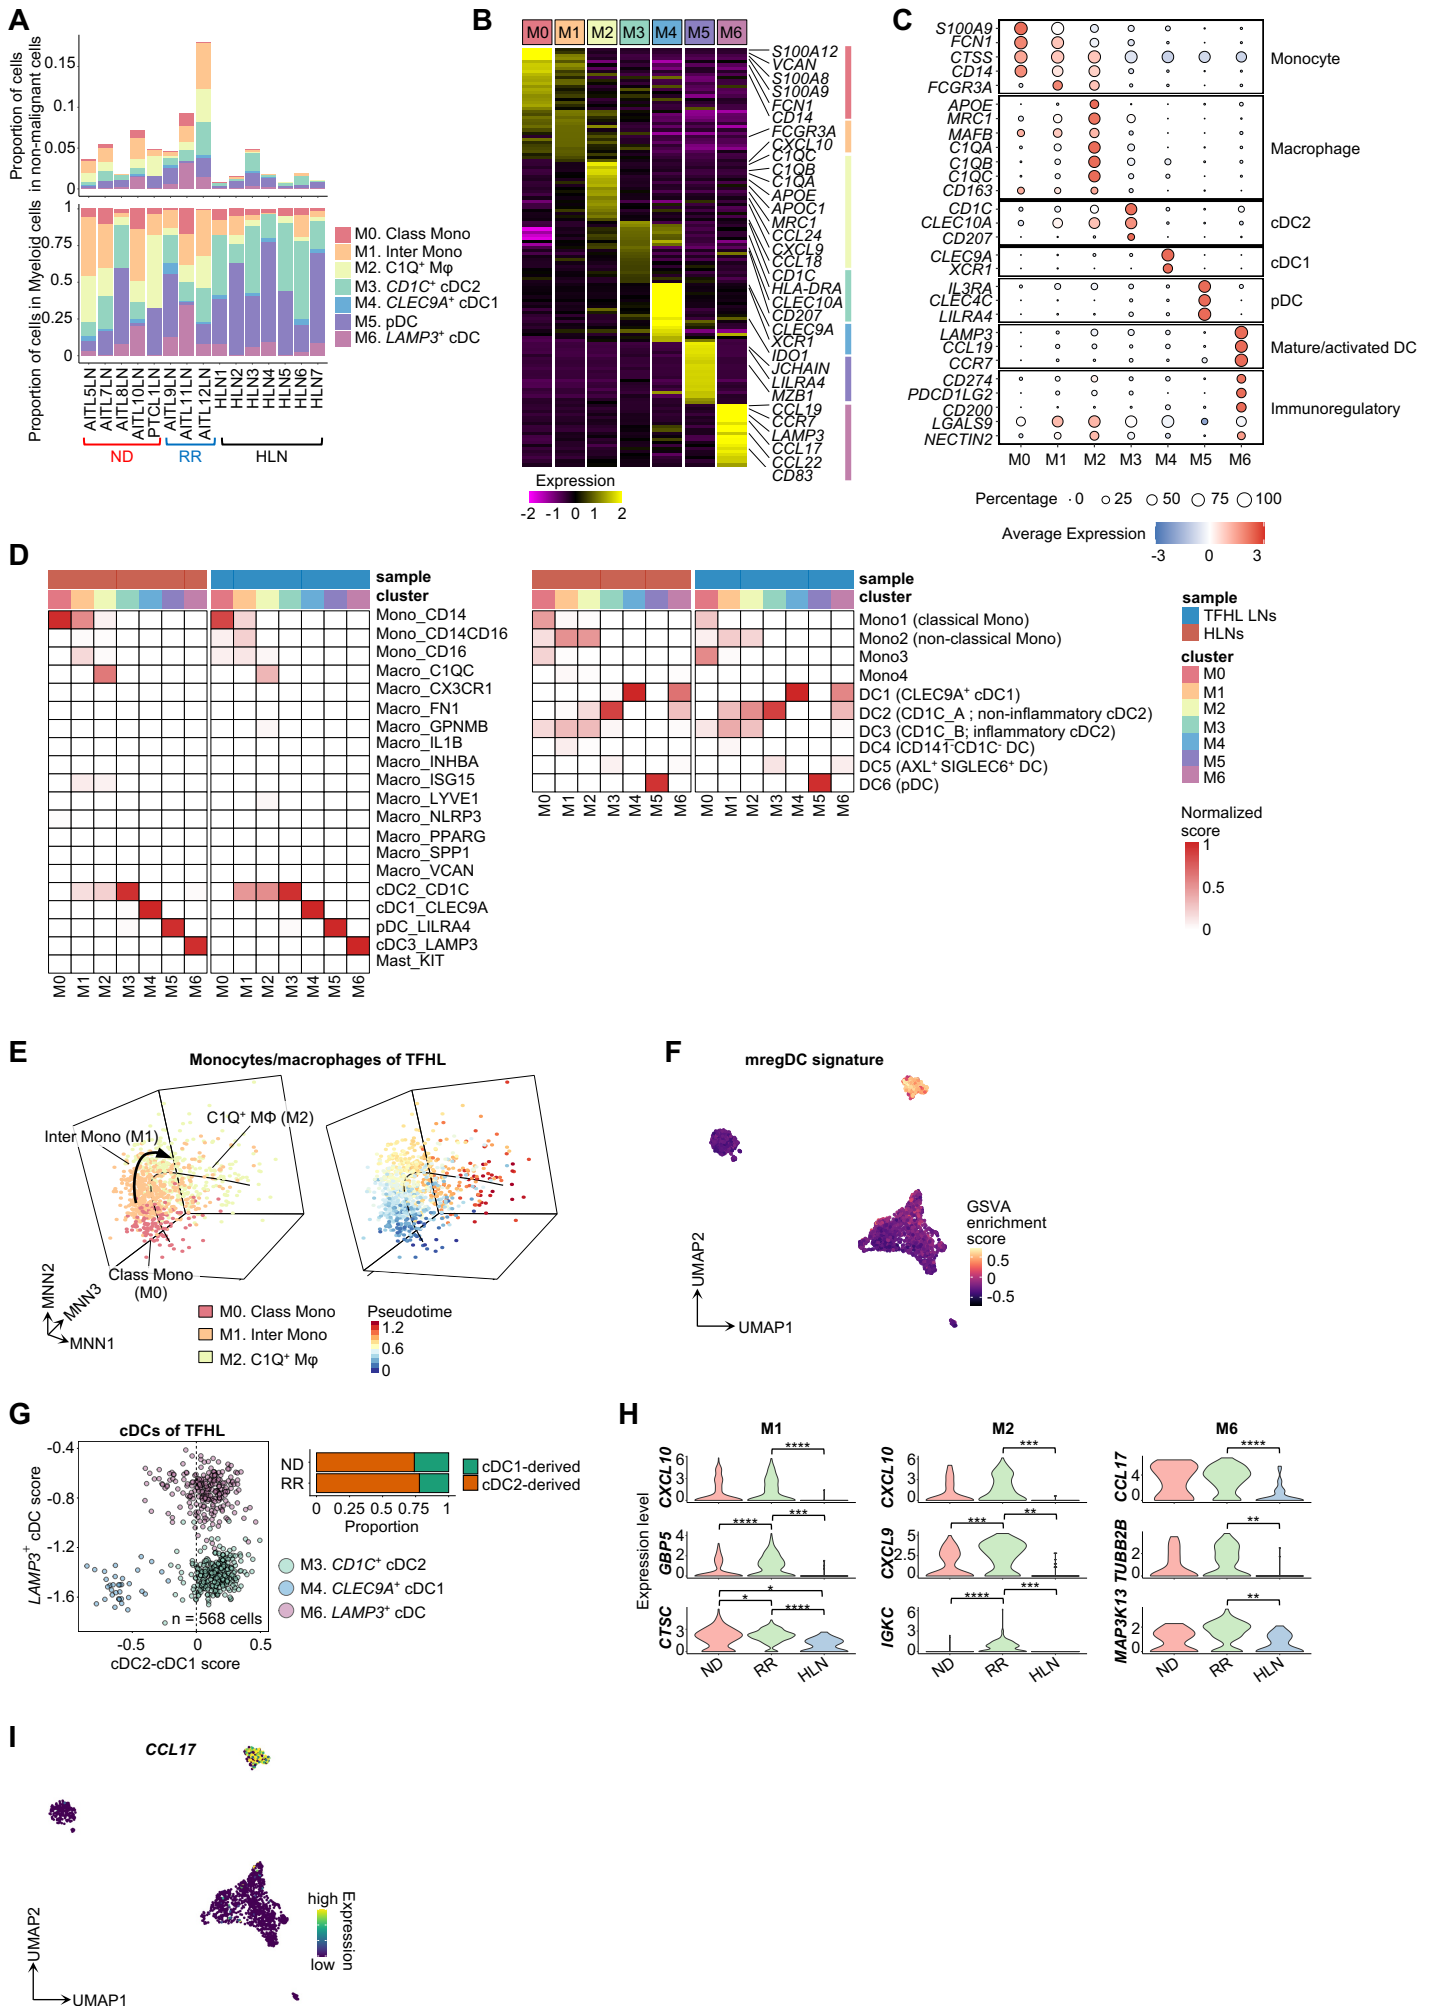

580 **Figure S11. Annotation of LN myeloid-cell subclusters**

581 (A) Proportions of each LN myeloid-cell subcluster within non-malignant MNCs (top) and  
582 myeloid cells (bottom) for each sample. C1Q<sup>+</sup> Mφ, complement component C1q positive  
583 macrophage; CD1C<sup>+</sup> cDC2, CD1C-positive type2 conventional dendritic cell; Class Mono,  
584 classical monocyte; *CLEC9A*<sup>+</sup> cDC1, *CLEC9A*-positive type1 cDC; Inter Mono, intermediate  
585 monocyte; *LAMP3*<sup>+</sup> cDC, *LAMP3*-positive cDC; pDC, plasmacytoid DC.

586 (B) Heatmap of the top 20 DEGs for each cluster of LN myeloid cells.

587 (C) Average expression per cluster of selected markers for cell-type annotation in LN myeloid  
588 cells.

589 (D) Cell-type estimation scores by SingleR [13] for each cluster of LN myeloid cells using  
590 scRNA-seq data from Cheng et al. [9] (left) and Villani et al. [5] (right).

591 (E) Trajectory inference by Slingshot [28] for LN monocytes and macrophages (M0–2) of  
592 TFHL, color-coded by cluster (left) and pseudo-time (right).

593 (F) GSVA enrichment scores for “mature DC enriched in immunoregulatory molecules  
594 (mregDC)” signature [49] in LN myeloid cells.

595 (G) Estimation of the origin of *LAMP3*<sup>+</sup> cDCs of TFHL using a previously reported scoring  
596 system [9,49].

597 (H) Violin plots of the top 3 DEGs upregulated in myeloid subclusters increasing in RR TFHL  
598 LNs compared with those of HLNs. *P*-values are shown only for significant differences. \**P* < 5.0  
599 × 10<sup>-2</sup>, \*\**P* < 1.0 × 10<sup>-2</sup>, \*\*\**P* < 1.0 × 10<sup>-3</sup>, \*\*\*\**P* < 1.0 × 10<sup>-4</sup>.

600 (I) Feature plot of *CCL17* in LN myeloid cells from TFHL patients.

Supplementary Figure 12

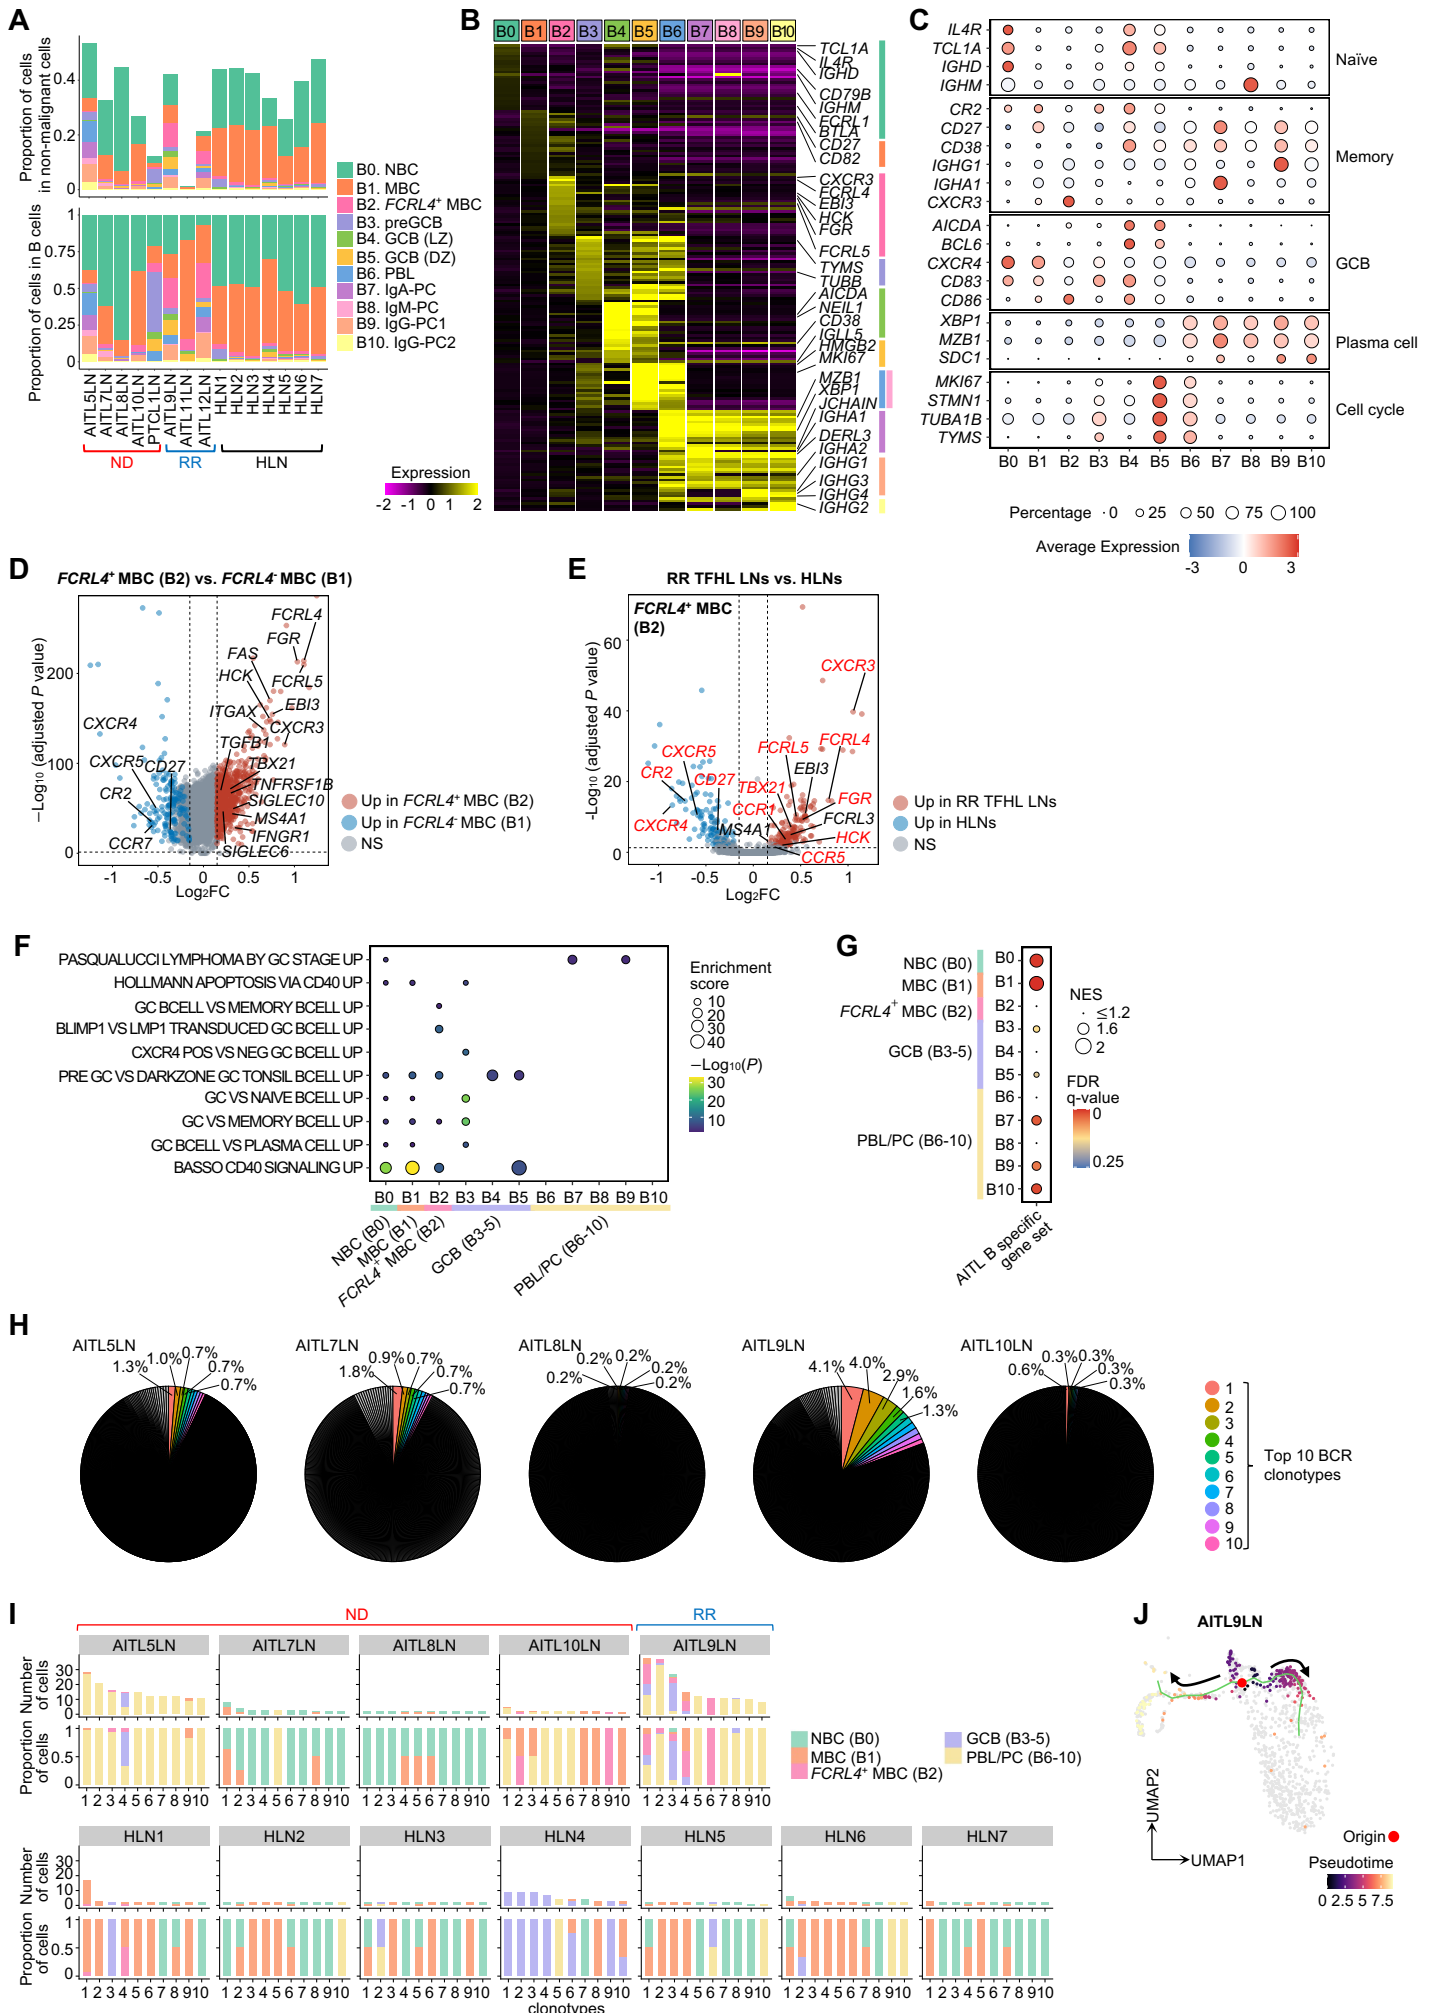

601 **Figure S12. Annotation of LN B-cell subclusters**

602 (A) Proportions of each LN B-cell subcluster within non-malignant MNCs (top) and within B  
603 cells (bottom) for each sample. *FCRL4*<sup>+</sup> MBC, *FCRL4*-positive memory B cell; GCB (DZ),  
604 germinal center B cell in the dark zone; GCB (LZ), GCB in the light zone; MBC, memory B cell;  
605 NBC, naïve B cell; PBL, plasmablast; PC, plasma cell; preGCB, pre-germinal center B cell.

606 (B) Heatmap of the top 25 DEGs for each cluster of LN B cells.

607 (C) Average expression per cluster of selected markers for cell-type annotation in LN B cells.

608 (D) Volcano plot of DEGs in *FCRL4*<sup>+</sup> MBCs (B2, red) and *FCRL4*<sup>-</sup> MBCs (B1, blue) of LNs.

609 (E) Volcano plot of DEGs in *FCRL4*<sup>+</sup> MBCs from RR TFHL LNs (red) and those from HLNs  
610 (blue).

611 (F) Dot plot of GO analysis of DEGs upregulated in B cells from TFHL LNs compared with  
612 those from HLNs for GCB-related pathways analyzed by Fujisawa et al. [1].

613 (G) Dot plot of gene set enrichment analysis for an AITL B-specific gene set previously  
614 reported [1]. Cut-off, false discovery rate (FDR)  $q$ -value < 0.25; NSE, normalized enrichment  
615 score.

616 (H) Pie charts of BCR clonotypes for each TFHL sample. The top 10 BCRs are colored and  
617 the proportions of the top 5 BCRs are shown.

618 (I) Clone sizes of the top 10 BCR clonotypes for each LN sample. The number (top) and  
619 proportions (bottom) of cells expressing each clonotype were shown color-coded by cell types.

620 (J) Trajectory analysis by Monocle3 [27] for the cells sharing BCRs with *FCRL4*<sup>+</sup> MBCs in  
621 AITL9LN. The red point was set as the origin of the trajectory. The cells without sharing the  
622 BCRs are shown in gray.

Supplementary Figure 13

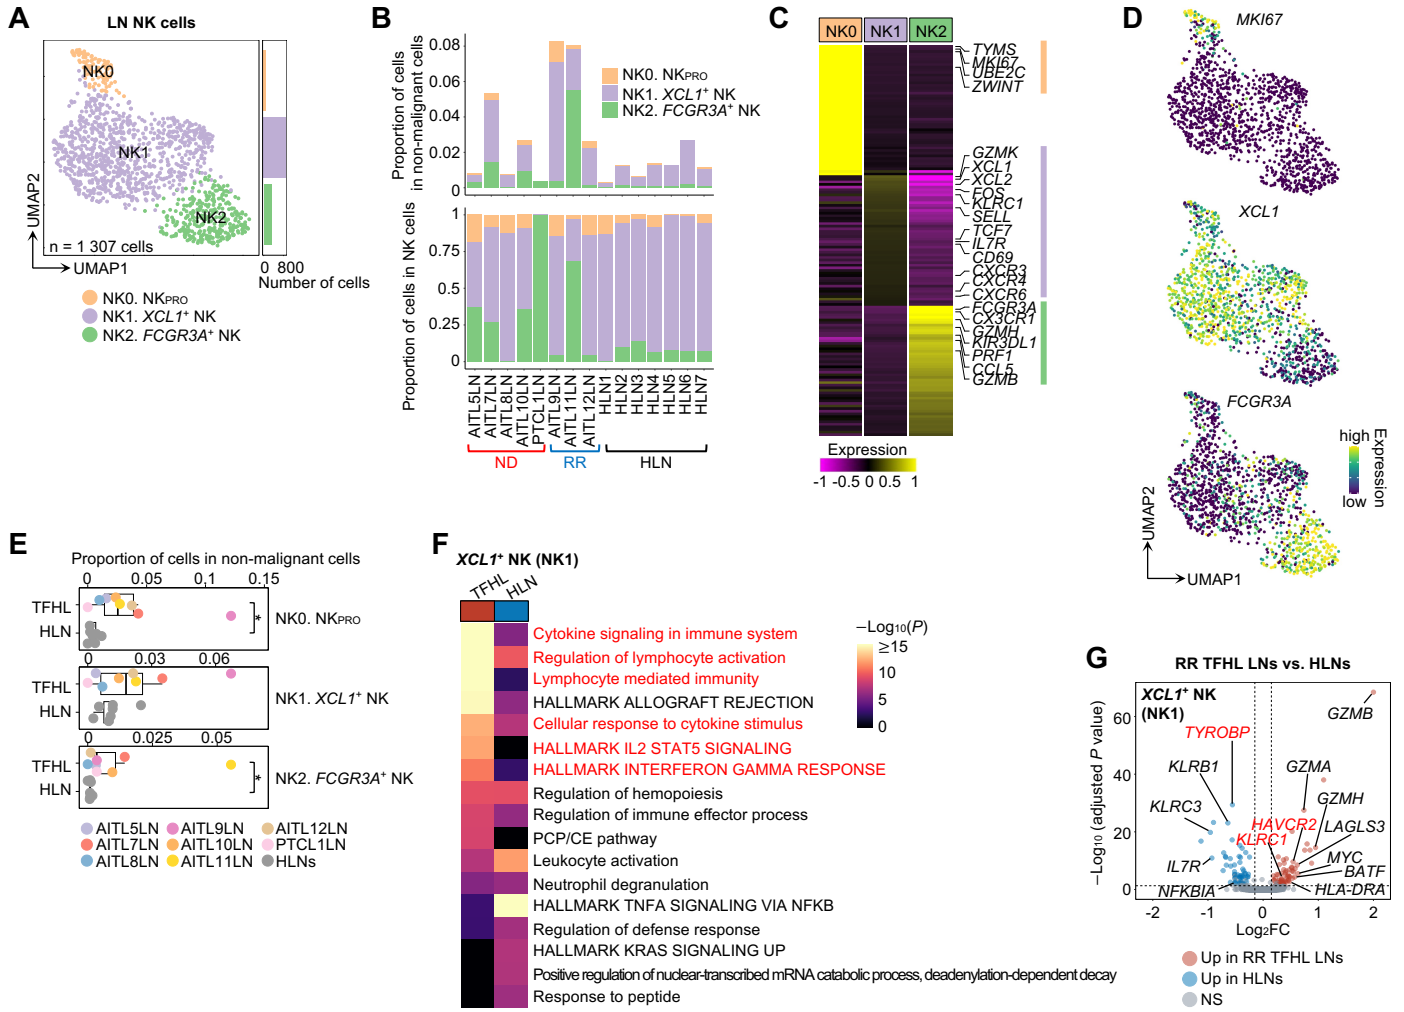

623 **Figure S13. Subclustering of LN NK cells**

624 (A) UMAP plot of LN NK-cell subclusters. *FCGR3A*<sup>+</sup> NK, *FCGR3A*-positive activated natural  
625 killer cell; NK<sub>PRO</sub>, proliferative NK; *XCLI*<sup>+</sup> NK, *XCLI*-positive tissue-resident NK.

626 (B) Proportions of each LN NK-cell subcluster within non-malignant MNCs (top) and within  
627 NK cells (bottom) for each sample.

628 (C) Heatmap of the top 50 DEGs for each cluster of LN NK cells.

629 (D) Feature plots of marker genes in LN NK cells.

630 (E) Comparison of proportions of each subcluster of LN NK cells in non-malignant MNCs of  
631 each sample. The boxplots show the median (center line), interquartile range (box limits),  
632 minimum to max values (whiskers), and samples (dots) for each group. *P*-values are shown only  
633 when there is a significant difference. \**P* < 5.0 × 10<sup>-2</sup>.

634 (F) Heatmap of the top 10 pathways detected by GO analysis between *XCLI*<sup>+</sup> NKs (NK1) from  
635 TFHL LNs and those from HLNs.

636 (G) Volcano plot of DEGs in *XCLI*<sup>+</sup> NKs (NK1) from RR TFHL LNs (red) and those from  
637 HLNs (blue).

# Supplementary Figure 14

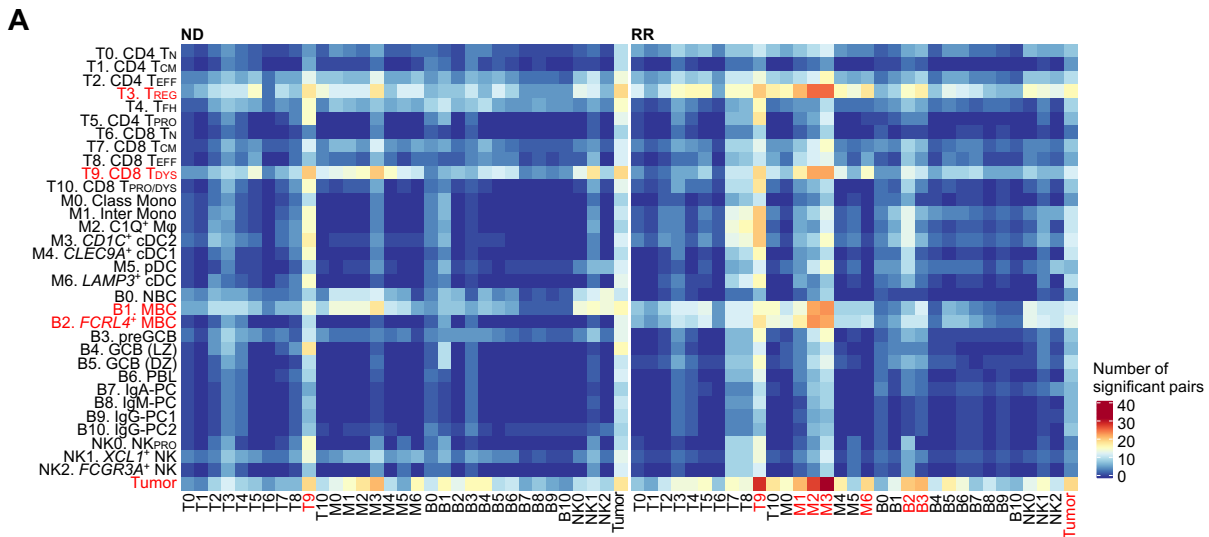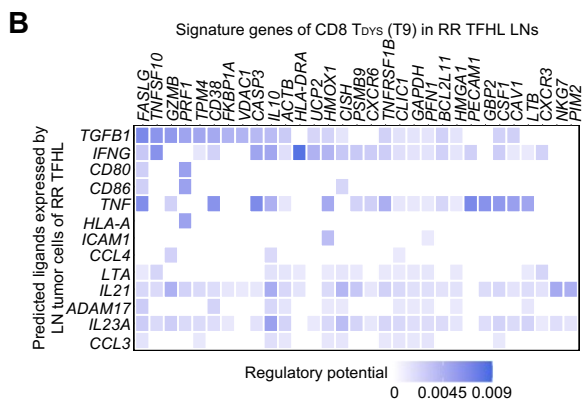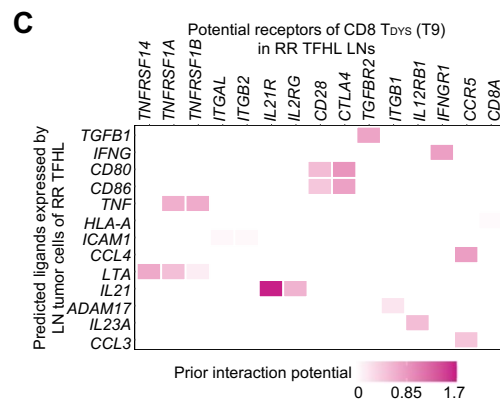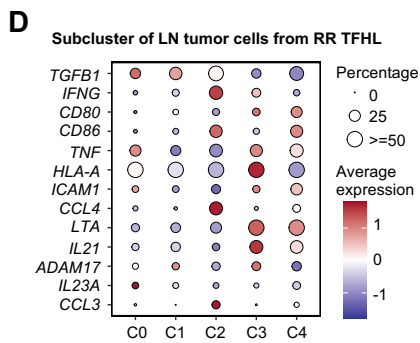



638 **Figure S14. *In silico* cell-cell interaction analysis of TFHL LNs**

639 (A) Number of significant interactions detected by *in silico* cellular interaction analysis using  
640 CellPhoneDB [29] performed between tumor cells and subclusters of immune cells from ND (left)  
641 and RR (right) TFHL LNs.

642 (B,C) Estimation of possible ligands (B), which can cause dysfunctional/exhausted signatures  
643 of CD8 T<sub>DYS</sub> from RR TFHL LNs, and their receptors expressed on tumor cells (C) by NicheNetR  
644 [30]. Only interactions selected based on validated curated ligand-receptor databases are  
645 visualized.

646 (D) Dot plot of average expression per tumor-cell subcluster of the receptors that can drive the  
647 CD8 T<sub>DYS</sub> signature estimated by NicheNetR.

# Supplementary Figure 15

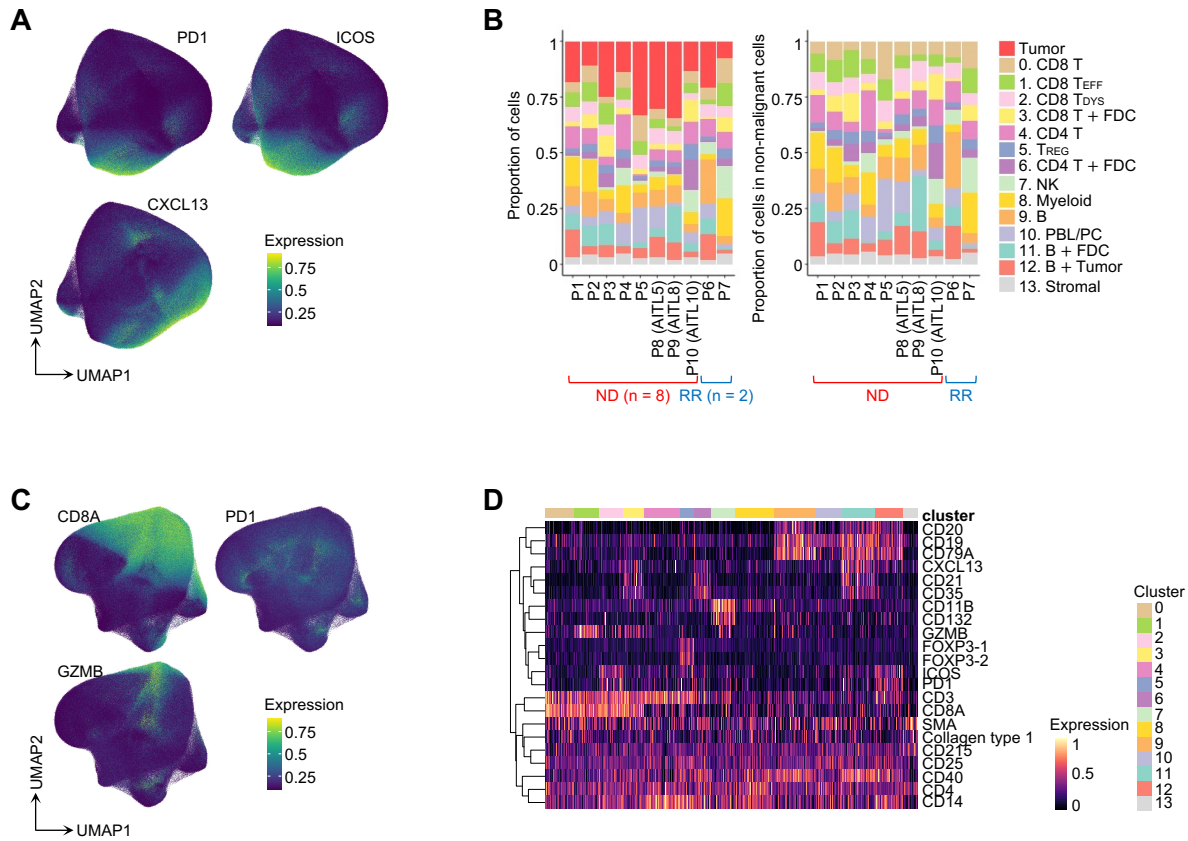

648 **Figure S15. Single-cell spatial analysis of TFHL tissues**

649 (A) Feature plots of  $T_{FH}$  markers in all cells from TFHL tissues.

650 (B) Proportions of each cluster within all cells (left) and within non-malignant cells (right) for  
651 each sample.

652 (C) Feature plots of markers related to  $CD8^+$  T cell types in non-malignant cells.

653 (D) Heatmap of markers for each cluster of non-malignant cells.

# Supplementary Figure 16

**A**

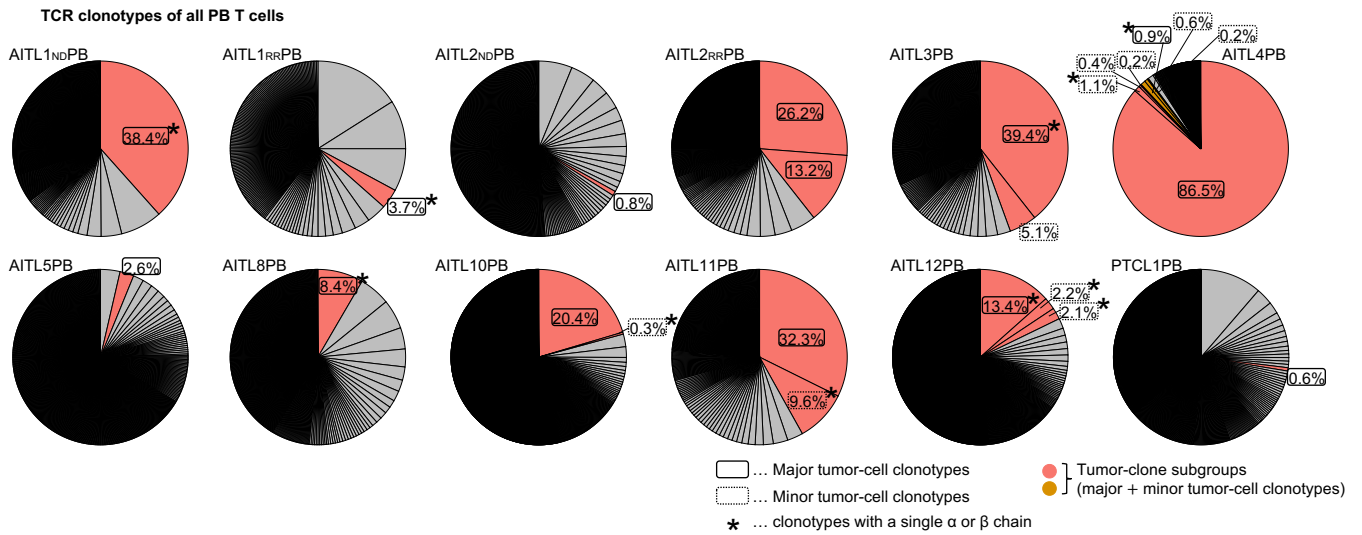

**B**

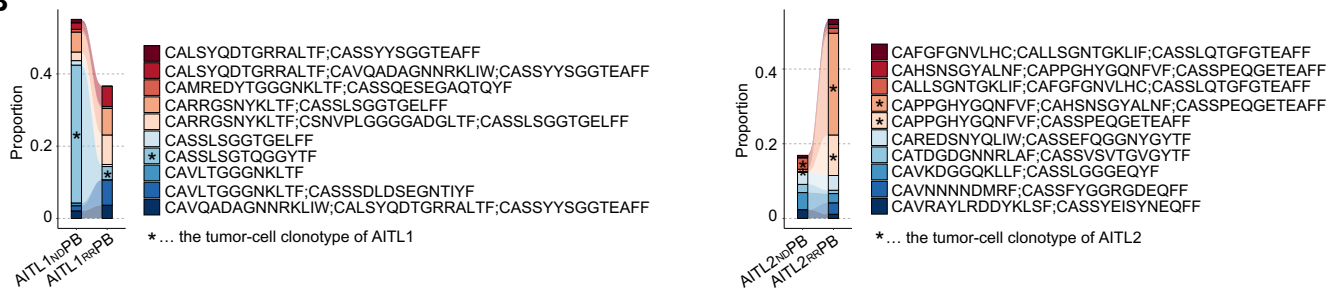

654 **Figure S16. TCR repertoire analysis of PB samples**

655 (A) Pie charts of TCR clonotypes for each sample. Tumor clones are colored. Major tumor-  
656 cell clonotypes are indicated by solid lines, and minor tumor-cell clonotypes are indicated by  
657 dotted lines. Clonotypes with only one TCR chain are indicated by an asterisk (\*).

658 (B) Sankey plots showing TCR tracking of sequential samples (AITL1 and AITL2). The top  
659 10 clonotypes of samples from ND (AITL1<sub>ND</sub> and AITL2<sub>ND</sub>) and RR (AITL1<sub>RR</sub> and AITL2<sub>RR</sub>)  
660 TFHLs were compared and CDR3 sequences of each clonotype are shown. The major clonotypes  
661 of tumor cells are indicated by an asterisk (\*).

Supplementary Figure 17

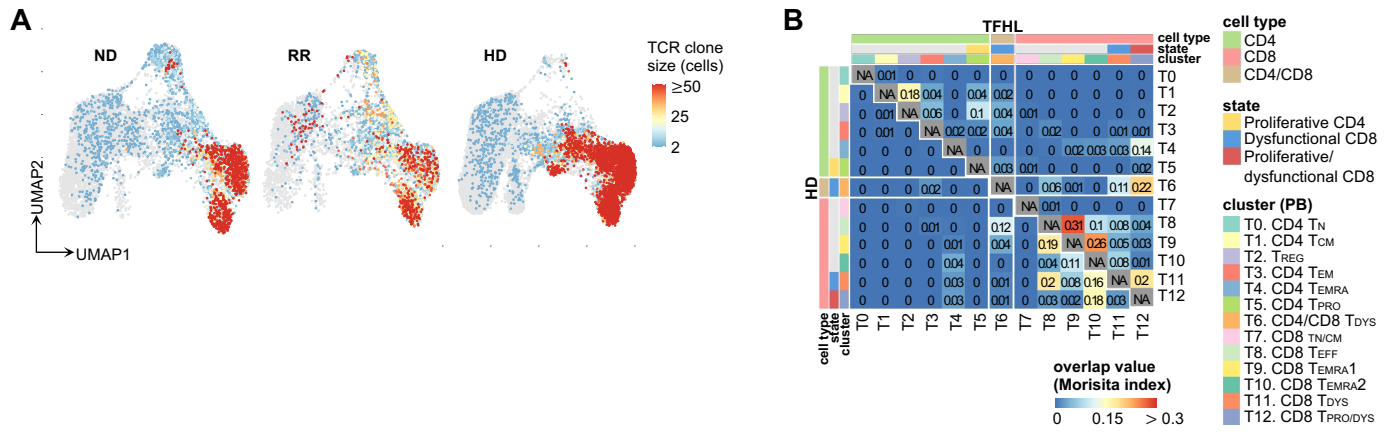

662 **Figure S17. Characteristics of subclusters of non-malignant PB T cells**

663 (A) Clone size of TCRs in non-malignant PB T cells. The number of cells expressing each  
664 clonotype was defined as clone size and illustrated for each cell.

665 (B) TCR overlap analysis of non-malignant PB T cells, analyzed and illustrated for PB from  
666 TFHL patients (upper right) and HDs (lower left), respectively.

# Supplementary Figure 18

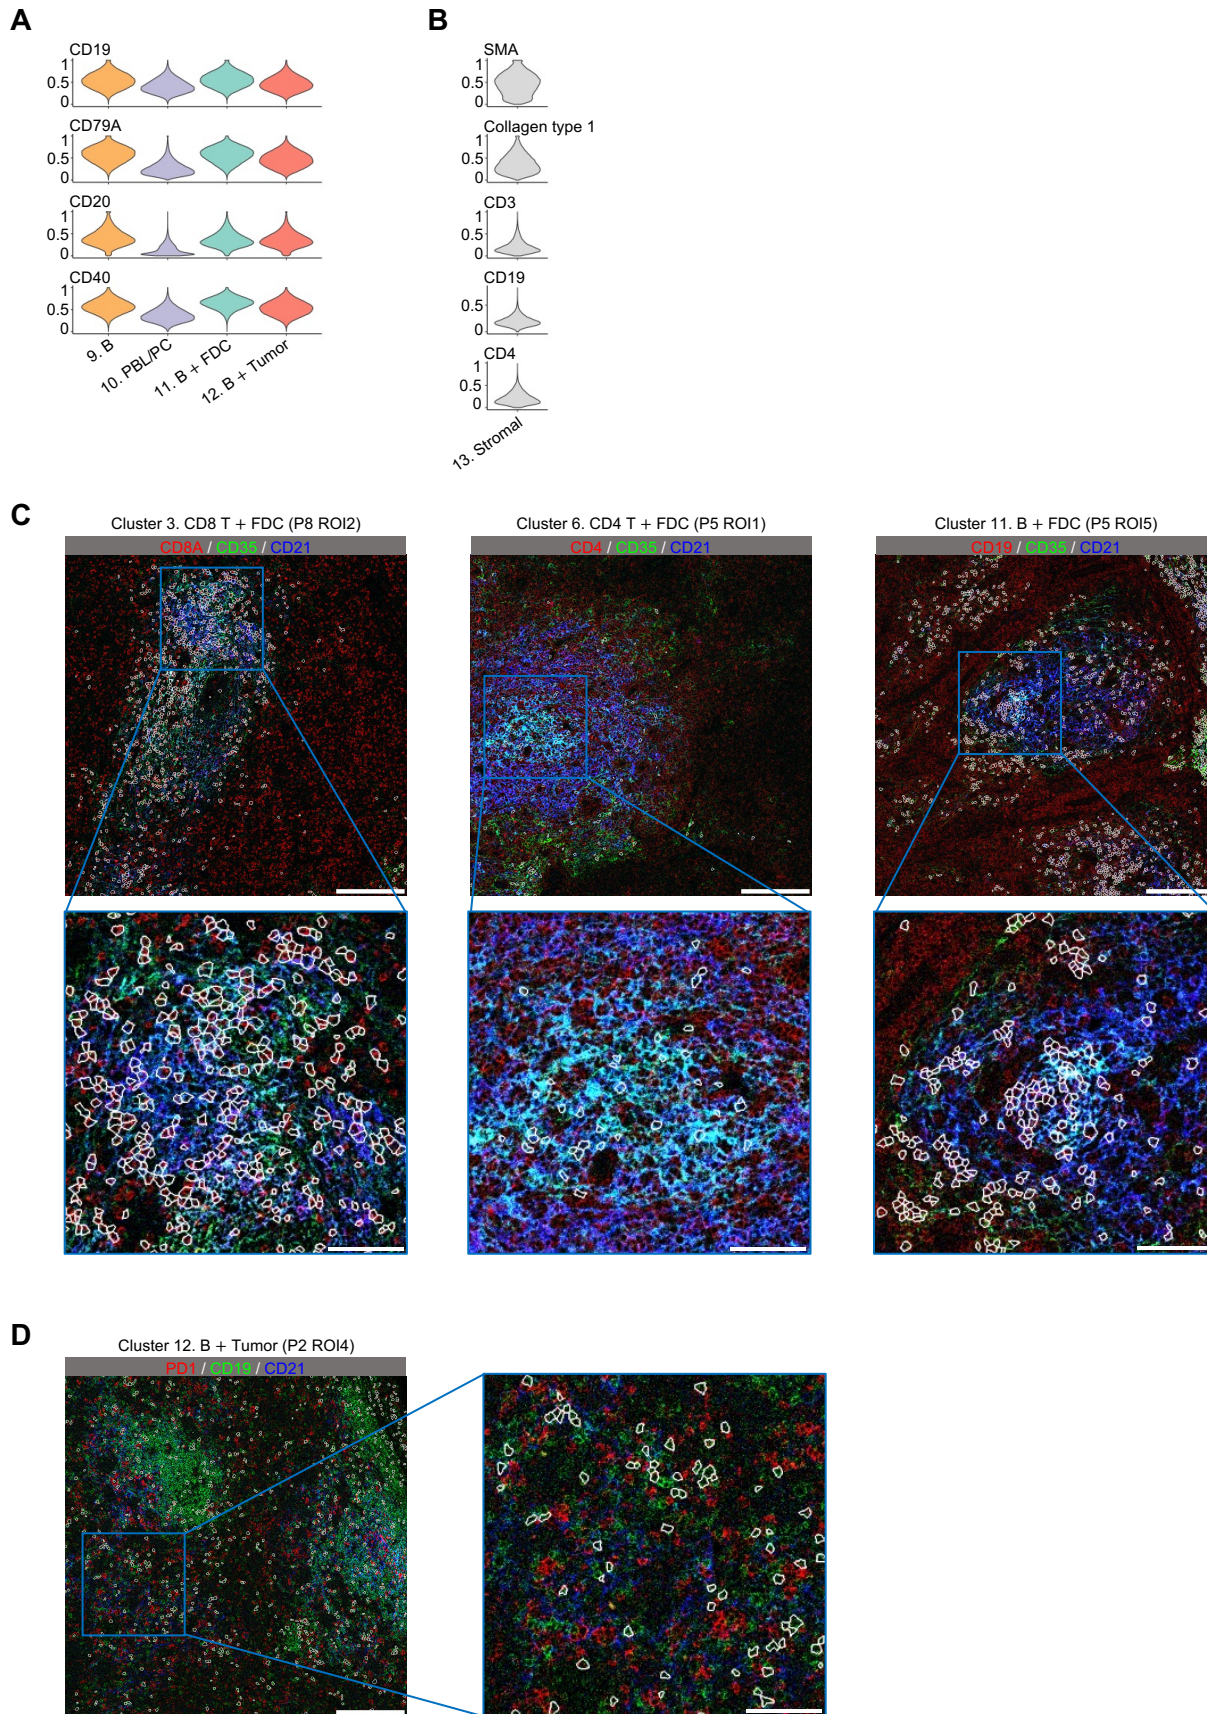



667 **Figure S18. Annotation of subclusters of non-malignant cells in spatial analysis**

668 (A) Violin plots of B-cell markers in B-cell clusters (clusters 9–12).

669 (B) Violin plots of stromal and lineage markers in a stromal-cell cluster (cluster 13).

670 (C) Representative IMC images of doublet clusters of FDCs and CD8<sup>+</sup> T (cluster 3, left), CD4<sup>+</sup>  
671 T (cluster 6, middle), and B (cluster 11, right) cells, colored according to expression levels of  
672 markers for FDCs (CD21 and CD35) and each cell (CD8A, CD4, and CD19, respectively). Cells  
673 belonging to each doublet cluster are outlined with white lines. ROI, region of interest; Scale bar,  
674 300  $\mu\text{m}$  (top) and 100  $\mu\text{m}$  (bottom).

675 (D) Representative IMC images of doublet clusters of B and tumor cells (cluster 12) colored  
676 according to expression levels of markers for B cells (CD19), tumor cells (PD1), and FDCs  
677 (CD21). Cells belonging to each doublet cluster are outlined with white lines. Scale bar, 300  $\mu\text{m}$   
678 (left) and 100  $\mu\text{m}$  (right).

679 **Supplementary References**

- 680 1 Fujisawa M, Nguyen TB, Abe Y, Suehara Y, Fukumoto K, Suma S *et al.* Clonal  
681 germinal center B cells function as a niche for T-cell lymphoma. *Blood* 2022; **140**:  
682 1937–1950.
- 683 2 Wickham H. *ggplot2*. Springer International Publishing: Cham, 2016 doi:10.1007/978-3-  
684 319-24277-4.
- 685 3 Wen W, Su W, Tang H, Le W, Zhang X, Zheng Y *et al.* Immune cell profiling of  
686 COVID-19 patients in the recovery stage by single-cell sequencing. *Cell Discov* 2020; **6**:  
687 31.
- 688 4 McCarthy DJ, Campbell KR, Lun ATL, Wills QF. Scater: pre-processing, quality  
689 control, normalization and visualization of single-cell RNA-seq data in R.  
690 *Bioinformatics* 2017; **33**: 1179–1186.
- 691 5 Villani A-C, Satija R, Reynolds G, Sarkizova S, Shekhar K, Fletcher J *et al.* Single-cell  
692 RNA-seq reveals new types of human blood dendritic cells, monocytes, and progenitors.  
693 *Science* 2017; **356**. doi:10.1126/science.aah4573.
- 694 6 Stuart T, Butler A, Hoffman P, Hafemeister C, Papalexi E, Mauck WM *et al.*  
695 Comprehensive Integration of Single-Cell Data. *Cell* 2019; **177**: 1888-1902.e21.
- 696 7 Haghverdi L, Lun ATL, Morgan MD, Marioni JC. Batch effects in single-cell RNA-  
697 sequencing data are corrected by matching mutual nearest neighbors. *Nat Biotechnol*  
698 2018; **36**: 421–427.
- 699 8 Lavin Y, Kobayashi S, Leader A, Amir E-AD, Elefant N, Bigenwald C *et al.* Innate  
700 Immune Landscape in Early Lung Adenocarcinoma by Paired Single-Cell Analyses. *Cell*  
701 2017; **169**: 750-765.e17.
- 702 9 Cheng S, Li Z, Gao R, Xing B, Gao Y, Yang Y *et al.* A pan-cancer single-cell

703 transcriptional atlas of tumor infiltrating myeloid cells. *Cell* 2021; **184**: 792-809.e23.

704 10 Yang C, Siebert JR, Burns R, Gerbec ZJ, Bonacci B, Rymaszewski A *et al.*  
705 Heterogeneity of human bone marrow and blood natural killer cells defined by single-  
706 cell transcriptome. *Nat Commun* 2019; **10**: 3931.

707 11 Pizzolato G, Kaminski H, Tosolini M, Franchini D-M, Pont F, Martins F *et al.* Single-  
708 cell RNA sequencing unveils the shared and the distinct cytotoxic hallmarks of human  
709 TCRV $\delta$ 1 and TCRV $\delta$ 2  $\gamma\delta$  T lymphocytes. *Proc Natl Acad Sci U S A* 2019; **116**: 11906–  
710 11915.

711 12 Germain P-L, Lun A, Garcia Meixide C, Macnair W, Robinson MD. Doublet  
712 identification in single-cell sequencing data using scDbtFinder. *F1000Research* 2021;  
713 **10**: 979.

714 13 Aran D, Looney AP, Liu L, Wu E, Fong V, Hsu A *et al.* Reference-based analysis of  
715 lung single-cell sequencing reveals a transitional profibrotic macrophage. *Nat Immunol*  
716 2019; **20**: 163–172.

717 14 Padovan E, Casorati G, Dellabona P, Meyer S, Brockhaus M, Lanzavecchia A.  
718 Expression of two T cell receptor alpha chains: dual receptor T cells. *Science* 1993; **262**:  
719 422–4.

720 15 Schuldt NJ, Binstadt BA. Dual TCR T Cells: Identity Crisis or Multitaskers? *J Immunol*  
721 2019; **202**: 637–644.

722 16 Shi Z, Zhang Q, Yan H, Yang Y, Wang P, Zhang Y *et al.* More than one antibody of  
723 individual B cells revealed by single-cell immune profiling. *Cell Discov* 2019; **5**: 64.

724 17 Brady BL, Steinel NC, Bassing CH. Antigen receptor allelic exclusion: an update and  
725 reappraisal. *J Immunol* 2010; **185**: 3801–8.

726 18 ImmunoMind. immunarch: An R Package for Painless Bioinformatics Analysis of T-Cell

727 and B-Cell Immune Repertoires. Zenodo. 2019.

728 19 Finak G, McDavid A, Yajima M, Deng J, Gersuk V, Shalek AK *et al.* MAST: a flexible  
729 statistical framework for assessing transcriptional changes and characterizing  
730 heterogeneity in single-cell RNA sequencing data. *Genome Biol* 2015; **16**: 278.

731 20 Zhou Y, Zhou B, Pache L, Chang M, Khodabakhshi AH, Tanaseichuk O *et al.*  
732 Metascope provides a biologist-oriented resource for the analysis of systems-level  
733 datasets. *Nat Commun* 2019; **10**: 1523.

734 21 Subramanian A, Tamayo P, Mootha VK, Mukherjee S, Ebert BL, Gillette MA *et al.*  
735 Gene set enrichment analysis: a knowledge-based approach for interpreting genome-  
736 wide expression profiles. *Proc Natl Acad Sci U S A* 2005; **102**: 15545–50.

737 22 Hänzelmann S, Castelo R, Guinney J. GSEA: gene set variation analysis for microarray  
738 and RNA-seq data. *BMC Bioinformatics* 2013; **14**: 7.

739 23 Robinson MD, McCarthy DJ, Smyth GK. edgeR: a Bioconductor package for  
740 differential expression analysis of digital gene expression data. *Bioinformatics* 2010; **26**:  
741 139–40.

742 24 McCarthy DJ, Chen Y, Smyth GK. Differential expression analysis of multifactor RNA-  
743 Seq experiments with respect to biological variation. *Nucleic Acids Res* 2012; **40**: 4288–  
744 97.

745 25 Kassambara A. rstatix:Pipe-Friendly Framework for Basic Statistical Tests. R package  
746 version 0.7.0. <https://CRANR-project.org/package=rstatix> 2021.

747 26 Qiu X, Hill A, Packer J, Lin D, Ma Y-A, Trapnell C. Single-cell mRNA quantification  
748 and differential analysis with Census. *Nat Methods* 2017; **14**: 309–315.

749 27 Cao J, Spielmann M, Qiu X, Huang X, Ibrahim DM, Hill AJ *et al.* The single-cell  
750 transcriptional landscape of mammalian organogenesis. *Nature* 2019; **566**: 496–502.

751 28 Street K, Risso D, Fletcher RB, Das D, Ngai J, Yosef N *et al.* Slingshot: cell lineage and  
752 pseudotime inference for single-cell transcriptomics. *BMC Genomics* 2018; **19**: 477.

753 29 Garcia-Alonso L, Handfield L-F, Roberts K, Nikolakopoulou K, Fernando RC, Gardner  
754 L *et al.* Mapping the temporal and spatial dynamics of the human endometrium in vivo  
755 and in vitro. *Nat Genet* 2021; **53**: 1698–1711.

756 30 Browaeys R, Saelens W, Saeys Y. NicheNet: modeling intercellular communication by  
757 linking ligands to target genes. *Nat Methods* 2020; **17**: 159–162.

758 31 Makishima K, Suehara Y, Abe Y, Hattori K, Kusakabe M, Matsuoka R *et al.* Intratumor  
759 heterogeneity of lymphoma identified by multiregion sequencing of autopsy samples.  
760 *Cancer Sci* 2022; **113**: 362–364.

761 32 Abe Y, Sakata-Yanagimoto M, Fujisawa M, Miyoshi H, Suehara Y, Hattori K *et al.* A  
762 single-cell atlas of non-haematopoietic cells in human lymph nodes and lymphoma  
763 reveals a landscape of stromal remodelling. *Nat Cell Biol* 2022; **24**: 565–578.

764 33 Robinson JT, Thorvaldsdóttir H, Winckler W, Guttman M, Lander ES, Getz G *et al.*  
765 Integrative genomics viewer. *Nat Biotechnol* 2011; **29**: 24–6.

766 34 McKenna A, Hanna M, Banks E, Sivachenko A, Cibulskis K, Kernytsky A *et al.* The  
767 Genome Analysis Toolkit: a MapReduce framework for analyzing next-generation DNA  
768 sequencing data. *Genome Res* 2010; **20**: 1297–303.

769 35 Petti AA, Williams SR, Miller CA, Fiddes IT, Srivatsan SN, Chen DY *et al.* A general  
770 approach for detecting expressed mutations in AML cells using single cell RNA-  
771 sequencing. *Nat Commun* 2019; **10**: 3660.

772 36 Tirosh I, Izar B, Prakadan SM, Wadsworth MH, Treacy D, Trombetta JJ *et al.* Dissecting  
773 the multicellular ecosystem of metastatic melanoma by single-cell RNA-seq. *Science*  
774 2016; **352**: 189–96.

775 37 Kurtenbach S, Cruz AM, Rodriguez DA, Durante MA, Harbour JW. Uphyloplot2:  
776 visualizing phylogenetic trees from single-cell RNA-seq data. *BMC Genomics* 2021; **22**:  
777 419.

778 38 Peng J, Sun B-F, Chen C-Y, Zhou J-Y, Chen Y-S, Chen H *et al.* Single-cell RNA-seq  
779 highlights intra-tumoral heterogeneity and malignant progression in pancreatic ductal  
780 adenocarcinoma. *Cell Res* 2019; **29**: 725–738.

781 39 Zanutelli VR, Bodenmiller B. ImcSegmentationPipeline: A pixel-classification based  
782 multiplexed image segmentation pipeline. *Zenodo* 2022. doi:10.5281/zenodo.3841961.

783 40 Berg S, Kutra D, Kroeger T, Strahle CN, Kausler BX, Haubold C *et al.* ilastik:  
784 interactive machine learning for (bio)image analysis. *Nat Methods* 2019; **16**: 1226–1232.

785 41 Stirling DR, Swain-Bowden MJ, Lucas AM, Carpenter AE, Cimini BA, Goodman A.  
786 CellProfiler 4: improvements in speed, utility and usability. *BMC Bioinformatics* 2021;  
787 **22**: 433.

788 42 Windhager J, Bodenmiller B, Eling N. An end-to-end workflow for multiplexed image  
789 processing and analysis. *bioRxiv* 2021.

790 43 Eling N, Damond N, Hoch T, Bodenmiller B. Cytomapper: an R/bioconductor package  
791 for visualisation of highly multiplexed imaging data. *Bioinformatics* 2020; **36**: 5706–8.

792 44 Sakaguchi S, Mikami N, Wing JB, Tanaka A, Ichiyama K, Ohkura N. Regulatory T  
793 Cells and Human Disease. *Annu Rev Immunol* 2020; **38**: 541–566.

794 45 Bagaev D V., Vroomans RMA, Samir J, Stervbo U, Rius C, Dolton G *et al.* VDJdb in  
795 2019: database extension, new analysis infrastructure and a T-cell receptor motif  
796 compendium. *Nucleic Acids Res* 2020; **48**: D1057–D1062.

797 46 Swerdlow SH, Campo E, Pileri SA, Lee Harris N, Stein H, Siebert R *et al.* The 2016  
798 revision of the World Health Organization classification of lymphoid neoplasms. *Blood*.

799 2016; **127**: 2375–2390.

800 47 Yabe M, Gao Q, Ozkaya N, Huet S, Lewis N, Pichardo JD *et al.* Bright PD-1 expression  
801 by flow cytometry is a powerful tool for diagnosis and monitoring of  
802 angioimmunoblastic T-cell lymphoma. *Blood Cancer J* 2020; **10**: 32.

803 48 Zhang L, Yu X, Zheng L, Zhang Y, Li Y, Fang Q *et al.* Lineage tracking reveals  
804 dynamic relationships of T cells in colorectal cancer. *Nature* 2018; **564**: 268–272.

805 49 Maier B, Leader AM, Chen ST, Tung N, Chang C, LeBerichel J *et al.* A conserved  
806 dendritic-cell regulatory program limits antitumour immunity. *Nature* 2020; **580**: 257–  
807 262.
